# Supplementary material for: Effect of a real-time feedback smartphone application (TCPRLink) on the quality of telephone-assisted CPR performed by trained laypeople in China: a manikin-based randomised controlled study
Source: PubMed Central journal article supplement — BMJ Open. 2020 Oct 5;10(10):e038813. doi: 10.1136/bmjopen-2020-038813 (PMC7539615; doi:10.1136/bmjopen-2020-038813), 2020-10-05
Supplement: bmjopen-2020-038813.draft_revisions.pdf [file bmjopen-2020-038813.draft_revisions.pdf]

# BMJ Open

BMJ Open is committed to open peer review. As part of this commitment we make the peer review history of every article we publish publicly available.

When an article is published we post the peer reviewers' comments and the authors' responses online. We also post the versions of the paper that were used during peer review. These are the versions that the peer review comments apply to.

The versions of the paper that follow are the versions that were submitted during the peer review process. They are not the versions of record or the final published versions. They should not be cited or distributed as the published version of this manuscript.

BMJ Open is an open access journal and the full, final, typeset and author-corrected version of record of the manuscript is available on our site with no access controls, subscription charges or pay-per-view fees (<http://bmjopen.bmj.com>).

If you have any questions on BMJ Open's open peer review process please email [info.bmjopen@bmj.com](mailto:info.bmjopen@bmj.com)

# BMJ Open

## Effect of a Real Time Feedback Smartphone Application (TCPRLink) on the Quality of Layperson Telephone-assisted CPR Performance

|                               |                                                                                                                                                                                                                                                                                                                             |
|-------------------------------|-----------------------------------------------------------------------------------------------------------------------------------------------------------------------------------------------------------------------------------------------------------------------------------------------------------------------------|
| Journal:                      | <i>BMJ Open</i>                                                                                                                                                                                                                                                                                                             |
| Manuscript ID                 | bmjopen-2020-038813                                                                                                                                                                                                                                                                                                         |
| Article Type:                 | Original research                                                                                                                                                                                                                                                                                                           |
| Date Submitted by the Author: | 27-Mar-2020                                                                                                                                                                                                                                                                                                                 |
| Complete List of Authors:     | Dong, Xuejie; Shanghai Jiao Tong University School of Public Health, Zhang, Lin; Shanghai Jiao Tong University School of Public Health, Myklebust, Helge; Laerdal Medical Cooperation Birkenes, Tonje; Laerdal Medical Cooperation Zheng, Zhi-Jie ; Peking University, Department of Global Health, School of Public Health |
| Keywords:                     | ACCIDENT & EMERGENCY MEDICINE, PUBLIC HEALTH, Telemedicine < BIOTECHNOLOGY & BIOINFORMATICS                                                                                                                                                                                                                                 |
|                               |                                                                                                                                                                                                                                                                                                                             |

SCHOLARONE™  
Manuscripts

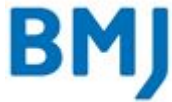

I, the Submitting Author has the right to grant and does grant on behalf of all authors of the Work (as defined in the below author licence), an exclusive licence and/or a non-exclusive licence for contributions from authors who are: i) UK Crown employees; ii) where BMJ has agreed a CC-BY licence shall apply, and/or iii) in accordance with the terms applicable for US Federal Government officers or employees acting as part of their official duties; on a worldwide, perpetual, irrevocable, royalty-free basis to BMJ Publishing Group Ltd ("BMJ") its licensees and where the relevant Journal is co-owned by BMJ to the co-owners of the Journal, to publish the Work in this journal and any other BMJ products and to exploit all rights, as set out in our [licence](#).

The Submitting Author accepts and understands that any supply made under these terms is made by BMJ to the Submitting Author unless you are acting as an employee on behalf of your employer or a postgraduate student of an affiliated institution which is paying any applicable article publishing charge ("APC") for Open Access articles. Where the Submitting Author wishes to make the Work available on an Open Access basis (and intends to pay the relevant APC), the terms of reuse of such Open Access shall be governed by a Creative Commons licence – details of these licences and which [Creative Commons](#) licence will apply to this Work are set out in our licence referred to above.

Other than as permitted in any relevant BMJ Author's Self Archiving Policies, I confirm this Work has not been accepted for publication elsewhere, is not being considered for publication elsewhere and does not duplicate material already published. I confirm all authors consent to publication of this Work and authorise the granting of this licence.

1  
2  
3  
4 **Effect of a Real-Time Feedback Smartphone Application (TCPRLink) on the**  
5  
6  
7 **Quality of Layperson Telephone-assisted CPR Performance**  
8

9 Xuejie Dong <sup>1\*</sup>, Lin Zhang <sup>1\*#</sup>, Helge Myklebust <sup>2</sup>, Tonje Soraas Birkenes <sup>2</sup>, Zhi-Jie  
10 Zheng<sup>3</sup>  
11  
12

- 13  
14 1. Shanghai Jiao Tong University School of Public Health  
15  
16 2. Laerdal Medical, Norway  
17  
18 3. Peking University School of Public Health  
19  
20  
21

22  
23 **# Correspondence and reprint request to:**  
24

25 Lin Zhang, Ph.D, Assistant Professor of Epidemiology, Shanghai Jiao Tong University  
26 School of Public Health, 227 South Chongqing Road, Shanghai, 200025, China, e-mail:  
27 [zhanglynn@sjtu.edu.cn](mailto:zhanglynn@sjtu.edu.cn)  
28  
29  
30

31  
32 \* XJ Dong and L Zhang were contributed equally to this article.  
33  
34  
35  
36  
37  
38  
39  
40  
41  
42  
43  
44  
45  
46  
47  
48  
49  
50  
51  
52  
53  
54  
55  
56  
57  
58  
59  
60

## Abstract

**Objectives:** To determine the effect of a free smartphone application (TCPRLink) which provides real-time monitoring and audio-visual feedback on chest compressions (CCs) on layperson telephone-assisted CPR (T-CPR) performance.

**Design:** A manikin-based randomized experimental study.

**Setting:** This study was conducted at a comprehensive university and a community center in China.

**Participants:** One hundred and eighty-six laypeople aged 18-65 years were recruited. Healthcare-related professionals were excluded.

**Interventions:** Participants were randomized assigned into TCPRLink feedback group and T-CPR group by age stratification. Individuals T-CPR performance were test in both groups.

**Primary and secondary outcome measures:** Primary outcomes were CCs rate and proportion of adequate CCs rate ( $100-120 \text{ min}^{-1}$ ) during 6-minute compression-only CPR. Secondary outcomes included the proportion of participants counting the CCs rhythm, time to the first CC, CCs depth, hands-off time and CCs fully release ratio.

**Results:** Participants in TCPRLink feedback group ( $n=94$ ) performed more consistently CCs with higher rate both initially and 3 month later [median 111 (IQR 109-113) vs. 108 (103-112)  $\text{min}^{-1}$ ,  $P=0.002$  and 111 (109-113) vs. 108 (105-112)  $\text{min}^{-1}$ ,  $P<0.001$ , respectively], with less need to count the rhythm [21.3% vs. 41.3%,  $P=0.003$  and 7% vs. 22.6%,  $P=0.004$ , respectively] compared with the T-CPR group ( $n=92$ ). There were no significant differences in hands-off time, CCs fully release ratio and time to the first compression between two groups. Among 55-65 years, CCs depth were deeper in TCPRLink group than control group [ $47.1 \pm 9.6$  vs  $38.5 \pm 8.7$  mm,  $P=0.001$ , and  $44.7 \pm 10.1$  vs  $39.3 \pm 10.8$  mm,  $P=0.07$ , respectively].

**Conclusions:** TCPRLink improved layperson T-CPR quality in terms of CCs rate in simulated scenario. Further investigations are required to confirm its effectiveness in actual resuscitation attempts.

### Strengths and limitations of this study

1. This randomized control study evaluated the effect of a novel, digital invention of a combined audio-visual smartphone application and web system (TCPRLink), which provides dispatcher instructions and real-time feedback to ensure CPR quality.
2. We compared the quality of telephone CPR (T-CPR) performance by the potential rescuers aged between 18-65 years in a cardiac arrest simulation scenario.
3. We invited a senior dispatcher using standardized dispatch instructions to portray T-CPR scenario.
4. Outcomes were measured both immediately after T-CPR training and three months later to investigate the long-term effect of the app.

## Introduction

Bystander provides immediate and adequate cardiopulmonary resuscitation (CPR) directly impact patient outcomes from cardiac arrest [1-3]. The updated American Heart Association (AHA) and European Resuscitation Council (ERC) guidelines state that telephone-assisted CPR (T-CPR) has a positive effect on the entire resuscitation process through getting more callers to start CPR and coaching callers to provide CPR [4 5]. Despite significant advances on the T-CPR instructions during the resuscitation procedures, a blind zone remains between the dispatcher and caller. While the dispatcher is voice connected to the caller by phone, they are unable to see the patient and evaluate bystander CPR quality which suggest a need for new strategies to address this challenge.

The ubiquitous presence and utilization of smartphones suggest a novel opportunity to improve resuscitation care through measurement of bystander CPR metrics [6-12]. In the recent statement from AHA and ERC, the use of digital strategies, such as mobile devices, to provide bystander with an accelerometer to measure CPR metrics were encouraged [13 14]. Adherence to guidelines, an audio-visual smartphone application (TCPRLink) was developed to help the bystander performing high-quality CPR and assist the dispatcher to evaluate the CPR quality real-time [15]. The TCPRLink application utilizes the smartphone front camera to detect the CCs and display the CCs rate to bystanders themselves. Meanwhile, it sends real-time CCs rate and time without no compressions over the internet to a monitor in front of the dispatcher. The aim of this present study was to evaluate the effectiveness of the TCPRLink application with real-time audio-visual feedback under telephone-dispatcher assisted simulated cardiac arrest situation. We hypothesized that this smartphone-based CCs rate feedback application would improve the quality of CPR in the general population compared to use conventional T-CPR instructions.

## Methods

## **2.1 Study design and ethics**

This study was a simulation-based randomized experimental trial carried out from September 1, 2018 to May 30, 2019. We obtained ethics approval from the Joint Research Ethics Board of the Shanghai Jiao Tong University Schools of Public Health and Nursing (SJUPN-201714).

## **2.2 Study population**

One hundred and eighty-six participants were randomly recruited from those who participated in the 'WeCan CPR' training program [16], a part of the China Resuscitation Academy. The inclusion criteria for enrolment in the study were college students and laypeople aged 18-65 years who had taken the WeCan CPR training within one week. Physicians, nurses, dispatchers, and other healthcare professionals were excluded from the study. All participants were verbally informed about the intention of the study and gave their written informed consent.

The CPR course is a video-based, one-hour training program applying Dispatcher-Telephone-Guided CPR training in combination with practical, basic CPR training targeted for potential bystanders. In the WeCan CPR training, participants learn how to call the emergency dispatch center, to follow the procedure of the T-CPR instructions, and to perform hands-only CPR. They performed at least 550 chest compressions on instrumented feedback manikins (QCPR Classroom, Laerdal Medical, Norway) during the training.

## **2.3 Patient and Public Involvement**

Patients or the public were not involved in the design, or conduct, or reporting, or dissemination of our research.

## **2.4 Randomization**

Randomization was stratified by age groups (18-24, 25-54, and 55-65 years) and conducted to ensure equal distribution of participants across study arms. Participants were randomized into either the control arm (conventional T-CPR group) or



1  
2  
3  
4 intervention arm (T-CPR with TCPRLink group). All participants were informed the  
5 purpose of the study to assess the impact of the TCPRLink App on resuscitation  
6 performance. They were not blinded to study arm allocation due to the nature of the  
7 intervention.  
8  
9  
10

### 11 ***2.5 Study procedures and T-CPR simulation scenario***

12  
13  
14 The study was performed in a quiet, isolated, designated room with a manikin placed  
15 on the floor. Individuals were asked to enter the room alone, make an emergency call  
16 to an assigned phone number, and try he/her best to rescue the manikin in a cardiac  
17 arrest T-CPR simulated scenario. T-CPR instructions were tightly standardized using  
18 Medical Priority Dispatch System (MPDS version 12.1, Salt Lake City, US) OHCA  
19 dispatch protocol [17]. One dispatcher with six years of T-CPR experience working at  
20 the local emergency dispatch center acted as dispatcher.  
21  
22  
23  
24  
25  
26  
27  
28

29 During T-CPR calls, individuals were asked about the current address, patient's age,  
30 gender, patient's consciousness and breathing as per MPDS protocol. Then, individuals  
31 were instructed by the dispatcher to activate the speaker, put the phone on the floor by  
32 the manikin. Dispatcher followed standard procedure to initiate CPR and let the  
33 participant do hands-only CPR for six minutes. For encouragement, the dispatcher  
34 counted the CCs rhythm with the participants and said "good job, push harder" every  
35 30 seconds during the simulation.  
36  
37  
38  
39  
40  
41  
42

43 For the conventional T-CPR group, the participants received no visual feedback from  
44 the smartphone and were guided only by the dispatcher instructions. For the TCPRLink  
45 group, individuals were asked to call using the TCPRLink app. TCPRLink (University  
46 of Stavanger and Laerdal Medical, Norway) is a free, CPR audio-visual feedback  
47 smartphone application designed to measure CCs rate and hands-off time and provide  
48 feedback both to the bystander and the dispatcher. The accuracy and validation of the  
49 TCPRLink app has been demonstrated earlier [18]. During the cardiac arrest simulation  
50 scenario, individuals pressed the "call emergency center" button to connect to the  
51 dispatcher and to activate the TCPRLink app which captures and analyzes the CPR  
52  
53  
54  
55  
56  
57  
58  
59  
60

1  
2  
3  
4 movement by the smartphone front-face camera in real-time. Different from the  
5 conventional T-CPR instruction, dispatcher reminded the participants to place the  
6 phone flat on the floor by the patient and make sure that their head and shoulders were  
7 visible by the front camera. When analyzing body movement movements, the  
8 individual received real-time objective feedback via a speedometer displayed for CCs  
9 rate (indicator in the green range of 100-120 and yellow range of either <100 or >120  
10 compressions/minute). The dispatcher received real-time objective feedback during the  
11 emergency call via sliding window from a website presented on a computer screen  
12 showing the development and history of the CCs rate (webserver:  
13 <http://tcpmlink.azurewebsites.net/?%20country=china>). For the six minutes hands-only  
14 CPR, dispatcher guided the individual CCs rate, and direct "push faster" "push slower"  
15 guided by the algorithm implemented on the website.  
16  
17  
18  
19  
20  
21  
22  
23  
24  
25  
26

27  
28 Three months later, subjects were called back to repeat the T-CPR test assigned to the  
29 same randomization group. All enrolled participants' behaviors and performance during  
30 the cardiac arrest simulation scenario were recorded by a separate video camera face to  
31 the manikin located 80 cm above the ground and 1.5 m away for a panorama shot.  
32  
33  
34  
35

## 36 **2.6 Outcome measures**

37  
38 The primary outcomes measured were the CCs rate and the percent of the adequate CCs  
39 meeting the guideline-recommended rate (100-120 min<sup>-1</sup>) [19 20] during six minutes  
40 hands-only CPR. Secondary outcomes were CCs depth, the percent of the adequate CCs  
41 depth (5-6 cm), the percent of chest compressions with complete recoil (complete  
42 release recoil of the chest between compressions) and the absolute hands-off time (the  
43 sum of all periods during which no hand was compression on the chest) during the six  
44 minutes hands-only CCs. The above parameters of CCs effectiveness were monitored  
45 using software for ResusciAnne<sup>®</sup> QCPR manikin (Laerdal Medical, Norway).  
46  
47  
48  
49  
50  
51  
52  
53

54  
55 The individual behaviors during the simulation scenario was video recorded, including  
56 the communication with the dispatcher (count the CCs rhythms with dispatcher), and  
57 time to first CC (time interval from call connected to first CC). We documented age,  
58  
59  
60

sex, education level, self-report body weight and height of all participants.

## 2.7 Statistical analysis

Differences in outcome for the categorical variables between the two groups were assessed using the Chi-square tests. Normal distribution was confirmed using Kolmogorov-Smirnov test. Independent student *t*-tests were conducted to explore the effect of the intervention for continuous variables with normal distribution, and Mann–Whitney U-test was used for variables with nonparametric distribution between the control and intervention arm. All analyses were conducted using SPSS 22.0. All *P* values were 2-sided, and *P* < 0.05 was considered to be statistically significant.

## Results

A total of 186 participants (94 in T-CPR with TCPRLink group and 92 in conventional T-CPR group) were included in this study. The demographic characteristics was shown in **Table 1**. Age, gender, education level, and body mass index (BMI) did not differ between the groups. Eight participants in each study arm were lost between the initial test and the follow up test 3 months later (**see consort diagram in Figure 1**).

During the six minutes of hands-only CPR, individuals in TCPRLink group performed CCs with higher rate both initially [median 111 (IQR 109-113) vs. 108 (IQR 103-112) min<sup>-1</sup>, *P*=0.002] and at 3 months [111 (IQR 109-113) vs. 108 (IQR 105-112) min<sup>-1</sup>, *P*<0.001], compared to conventional T-CPR group, respectively (**Table 2 and Figure 2**). In the TCPRLink group where the CCs rate speedometer was displayed, individuals were less likely to count out the CCs rhythms with the dispatcher [21.3% vs. 41.3%, *P*=0.003 and 7% vs. 22.6%, *P*=0.004, respectively] (**Table 2 and Figure 3**). Hands-off times, CCs fully released and time to first compression were not statistically different between the groups neither initially nor at 3 months follow-up.

CCs depth in TCPRLink group was significantly deeper in age group 55-65 [47.1 ± 9.6 vs. 38.5 ± 8.7 mm, *P*=0.001] compared to the control group in the initial cardiac arrest simulation scenarios (**Table 3**). The CCs depth also showed a deeper tendency but not

1  
2  
3 statistically significant in the simulation 3 months later [ $44.7 \pm 10.1$  vs.  $39.3 \pm 10.8$ mm,  
4  
5  $P=0.07$ ] (Table 4).  
6  
7

## 8 Discussion

9

10 This study evaluated a novel, digital invention of a combined audio-visual feedback  
11 smartphone app and web system, combining real-time dispatcher instructions and real-  
12 time feedback to ensure the quality of CPR. It compared the quality of T-CPR  
13 performed by the potential rescuers aged among 18-65 years on a cardiac arrest  
14 simulation scenario with or without the smartphone app. The results of the present study  
15 showed that real-time, audio-visual feedback using smartphone app and web system in  
16 combination with dispatcher instructions augmented the interaction between  
17 dispatchers and bystanders resulting in a positive effect on bystander CPR quality.  
18  
19

20 Although the dispatcher coach callers to do CPR, they rely on audio communication  
21 alone to figure out what is happening. Without other means of feedback, dispatcher  
22 instruction may lead to lower quality of CCs and more hands-off time [21]. Others have  
23 shown that video-instructed T-CPR significantly improved the CCs rate compared to  
24 the conventional audio-instructed method [22]. It was noted that guided by the audio-  
25 visual feedback app, callers did more consistent CCs than the T-CPR only group.  
26  
27

28 During dispatch assisted instructions, smartphone has become a promising carrier to  
29 improve video resuscitation care with its wide availability and high capabilities. Several  
30 diversified, advanced smartphone apps have been developed to fit the links of the chain  
31 of survival into a strengthened "Mobile chain of survival" [23]. Previous studies have  
32 shown the feasibility of these tools. One kind of app guide users in their CPR  
33 procedures via text and pictures or provide video examples of CPR with metronomic  
34 guidance that a bystander could watch before or during an actual resuscitation [6 8].  
35 Another kinds of app offers CPR quality measurement and feedback based on motion-  
36 sensing which require the user to place the phone on the patient's chest or hold it  
37 between rescuer's hands while performing CPR [9-12]. However, those previous  
38 smartphone solutions neglected the potency of the dispatcher. They may less suitable  
39  
40  
41  
42  
43  
44  
45  
46  
47  
48  
49  
50  
51  
52  
53  
54  
55  
56  
57  
58  
59  
60

1  
2  
3  
4 for real emergencies considering since the phone connection may be accidentally lost  
5 while using the phone as a CPR feedback device.  
6  
7

8 Different from other smartphone apps, TCPRLink utilizes the smartphone frontend  
9 camera for continuous quality improvement through real-time feedback for bystander  
10 as well as the dispatcher. Dispatcher could monitor the hands-off time and encourage  
11 the rescuer when they fatigue. A result of another study evaluates the smartphone APP  
12 effectiveness showed the aged over 60 years participants could not persist a long time  
13 CPR [9]. As the risk of OHCA increased with age [24 25], seniors are more likely to be  
14 bystanders when a cardiac arrest occurs in their spouse or family members. CPR  
15 capability of seniors was always a significant concern. Contrast with the previous study,  
16 we found TCPRLink App showed an extra stimulation in seniors aged 55-65 years as  
17 indicated by subgroup analysis. Quality of CPR by the subjects aged 55-65 years were  
18 as good as the younger age subjects during the 6 minutes hands-only CPR in the present  
19 study.  
20  
21  
22  
23  
24  
25  
26  
27  
28  
29  
30  
31

32 Moreover, providing a feasible CPR feedback devices for seniors might be an  
33 appropriate approach to increase not only their ability, but also their willingness and  
34 confidence to do CPR [9]. When guided by TCPRLink app, senior subject's CCs rate  
35 and depth were both better and within the guidelines compared to the conventional T-  
36 CPR group. Our data suggest that the two-way metric of CPR quality and dispatcher  
37 encouragement, seniors performed CPR quality equally well as the young generation.  
38  
39  
40  
41  
42  
43

44 Counting aloud is the most common method for which dispatcher can ensure proper  
45 CCs rate in T-CPR. Without getting feedback from the rescuer, dispatcher'  
46 understanding of the rescuer's situation was declined [26]. Interestingly, we found that  
47 visual guidance of CCs rate from the speedometer on the smartphone reduced the need  
48 to count out loud to maintain proper rate. This means that rescuers could spend more  
49 energy on compression and less energy on counting. Alternatively, less need for  
50 counting means that the dispatcher protocol can more often coach for compression  
51 depth and avoiding leaning. Contrary to common concerns that using mobile devices  
52 or smartphone Apps to improve CPR quality might cause time delayed to start CCs [8  
53  
54  
55  
56  
57  
58  
59  
60

1  
2  
3  
4 10], time to first CC in TCPRLink group was not prolonged compare with that in  
5 conventional T-CPR group in our present study.  
6  
7

8  
9  
10  
11  
12 Nevertheless, limitations of this study need to be mentioned. On the one hand, our  
13 present study was implemented in a simulated environment which may not reflect the  
14 real actions. Hawthorn effect could not be excluded under the simulation scenario,  
15 resulting in a motivation bias. Hence, our study followed a realistic approach simulating  
16 layperson resuscitation in a cardiac arrest situation. We invited a senior dispatcher who  
17 was working in the emergency dispatch center to portray the T-CPR scenario. On the  
18 other hand, manikin may not represent the diversity of patients' chests and changes in  
19 chest resistance during extended CPR. Lastly, we recruited the participants aged  
20 between 18-65 years. Elderly aged above 65 years were less likely to participant  
21 considering the physical capacity. The mean age of participants was about 40 years old,  
22 which might not be the representative age for bystanders in real life.  
23  
24  
25  
26  
27  
28  
29

### 30 **Conclusions**

31  
32  
33 The TCPRLink smartphone application providing real-time feedback to both rescuer  
34 and dispatcher could significantly improve the CPR quality of lay rescuers in terms of  
35 CCs rate in a simulated cardiac arrest scenario. Further investigations are required to  
36 confirm its effectiveness in real resuscitation incidents.  
37  
38  
39  
40

### 41 **Acknowledgments**

42  
43  
44 We would like to acknowledge the participants from Shanghai Jiao Tong University  
45 and Chaoyang community for their time and active involvement in this study.  
46  
47  
48

### 49 **Authors' contributions**

50  
51  
52 XJ Dong and L Zhang were contributed equally to this article. L Zhang conceptualized  
53 the study. XJ Dong and L Zhang performed the data collection and analysis. XJ Dong  
54 and L Zhang contributed to writing the paper. L Zhang, H Myklebust, TS Birkenes and  
55 Z-J Zheng provided administrative advices and consultations. H Myklebust, TS  
56  
57  
58  
59  
60

1  
2  
3  
4 Birkenes and Z-J Zheng critically revised the final version. All authors approved the  
5 final version of the manuscript.  
6  
7

### 8 **Competing interests**

9  
10  
11 There are no potential conflicts of interest for all authors in this study. H Myklebust  
12 and TS Birkenes are employees at Laerdal Medical. The manufacturer (Laerdal Medical,  
13 Norway) do not conflict with the trial or in interpreting the results.  
14  
15  
16

### 17 **Data sharing statement**

18  
19  
20 Data are available on reasonable request.  
21  
22

### 23 **Research Ethics Approval**

24  
25  
26 The study protocol was approved by the Joint Research Ethics Board of the Shanghai  
27 Jiao Tong University Schools of Public Health and Nursing under the approval ID of  
28 SJUPN-201714.  
29  
30  
31

### 32 **Funding**

33  
34  
35 This research was funded by the National Natural Science Foundation of China under  
36 Grant No. 81703303; Shanghai Municipal Government Pujiang Research Development  
37 Program under Grant No. 17PJC070; HeartRescue Project China Program; and  
38 Innovative Research Team of High-level Local Universities in Shanghai.  
39  
40  
41  
42

### 43 **Patient consent for publication**

44  
45  
46 Not required.  
47  
48

### 49 **Provenance and peer review**

50  
51  
52 Not commissioned; externally peer reviewed.  
53  
54  
55  
56  
57  
58  
59  
60



## Reference

1. Kern KB, Hilwig RW, Berg RA, et al. Importance of continuous chest compressions during cardiopulmonary resuscitation: improved outcome during a simulated single lay-rescuer scenario. *Circulation* 2002;**105**(5):645-9 doi: 10.1161/hc0502.102963[published Online First: Epub Date]].
2. Steen S, Liao Q, Pierre L, et al. The critical importance of minimal delay between chest compressions and subsequent defibrillation: a haemodynamic explanation. *Resuscitation* 2003;**58**(3):249-58 doi: 10.1016/s0300-9572(03)00265-x[published Online First: Epub Date]].
3. Meaney PA, Bobrow BJ, Mancini ME, et al. Cardiopulmonary resuscitation quality: [corrected] improving cardiac resuscitation outcomes both inside and outside the hospital: a consensus statement from the American Heart Association. *Circulation* 2013;**128**(4):417-35 doi: 10.1161/CIR.0b013e31829d8654[published Online First: Epub Date]].
4. Panchal AR, Berg KM, Cabanas JG, et al. 2019 American Heart Association Focused Update on Systems of Care: Dispatcher-Assisted Cardiopulmonary Resuscitation and Cardiac Arrest Centers: An Update to the American Heart Association Guidelines for Cardiopulmonary Resuscitation and Emergency Cardiovascular Care. *Circulation* 2019;**140**(24):e895-e903 doi: 10.1161/cir.0000000000000733[published Online First: Epub Date]].
5. Perkins GD, Handley AJ, Koster RW, et al. European Resuscitation Council Guidelines for Resuscitation 2015: Section 2. Adult basic life support and automated external defibrillation. *Resuscitation* 2015;**95**:81-99 doi: <https://doi.org/10.1016/j.resuscitation.2015.07.015>[published Online First: Epub Date]].
6. Semeraro F, Taggi F, Tammaro G, et al. iCPR: a new application of high-quality cardiopulmonary resuscitation training. *Resuscitation* 2011;**82**(4):436-41 doi: 10.1016/j.resuscitation.2010.11.023[published Online First: Epub Date]].
7. Zapletal B, Greif R, Stumpf D, et al. Comparing three CPR feedback devices and standard BLS in a single rescuer scenario: a randomised simulation study. *Resuscitation* 2014;**85**(4):560-6 doi: 10.1016/j.resuscitation.2013.10.028[published Online First: Epub Date]].
8. Sakai T, Kitamura T, Nishiyama C, et al. Cardiopulmonary resuscitation support application on a smartphone - randomized controlled trial. *Circulation journal : official journal of the Japanese Circulation Society* 2015;**79**(5):1052-7 doi: 10.1253/circj.CJ-14-1258[published Online First: Epub Date]].
9. Plata C, Stolz M, Warnecke T, et al. Using a smartphone application (PocketCPR) to determine CPR quality in a bystander CPR scenario - A manikin trial. *Resuscitation* 2019;**137**:87-93 doi: 10.1016/j.resuscitation.2019.01.039[published Online First: Epub Date]].
10. Paal P, Pircher I, Baur T, et al. Mobile phone-assisted basic life support augmented with a metronome. *The Journal of emergency medicine* 2012;**43**(3):472-7 doi: 10.1016/j.jemermed.2011.09.011[published Online First: Epub Date]].



11. Eaton G, Renshaw J, Gregory P, et al. Can the British Heart Foundation PocketCPR application improve the performance of chest compressions during bystander resuscitation: A randomised crossover manikin study. *Health informatics journal* 2018;**24**(1):14-23 doi: 10.1177/1460458216652645[published Online First: Epub Date]].
12. Kovic I, Lulic I, Lulic D. A new method of investigating the ergonomics of visual cardiopulmonary resuscitation (CPR) feedback delivery. *Resuscitation* 2012;**83**(9):e191-2 doi: 10.1016/j.resuscitation.2012.05.023[published Online First: Epub Date]].
13. Perkins GD, Handley AJ, Koster RW, et al. European Resuscitation Council Guidelines for Resuscitation 2015: Section 2. Adult basic life support and automated external defibrillation. *Resuscitation* 2015;**95**:81-99 doi: 10.1016/j.resuscitation.2015.07.015[published Online First: Epub Date]].
14. Kleinman ME, Goldberger ZD, Rea T, et al. 2017 American Heart Association Focused Update on Adult Basic Life Support and Cardiopulmonary Resuscitation Quality: An Update to the American Heart Association Guidelines for Cardiopulmonary Resuscitation and Emergency Cardiovascular Care. *Circulation* 2018;**137**(1):e7-e13 doi: 10.1161/cir.0000000000000539[published Online First: Epub Date]].
15. Meinich-Bache Ø, Engan K, Birkenes TS, et al. Real-Time Chest Compression Quality Measurements by Smartphone Camera. *J Healthc Eng* 2018;**2018**:6241856-56 doi: 10.1155/2018/6241856[published Online First: Epub Date]].
16. The WeCan CPR Training Program in China. Secondary The WeCan CPR Training Program in China 2019.
17. Medical Priority Dispatch System (version 12.1.3). Secondary Medical Priority Dispatch System (version 12.1.3) 2008.
18. Meinich-Bache O, Engan K, Birkenes TS, et al. Real-Time Chest Compression Quality Measurements by Smartphone Camera. *Journal of healthcare engineering* 2018;**2018**:6241856 doi: 10.1155/2018/6241856[published Online First: Epub Date]].
19. Monsieurs KG, Nolan JP, Bossaert LL, et al. European Resuscitation Council Guidelines for Resuscitation 2015: Section 1. Executive summary. *Resuscitation* 2015;**95**:1-80 doi: 10.1016/j.resuscitation.2015.07.038[published Online First: Epub Date]].
20. Neumar RW, Shuster M, Callaway CW, et al. Part 1: Executive Summary: 2015 American Heart Association Guidelines Update for Cardiopulmonary Resuscitation and Emergency Cardiovascular Care. *Circulation* 2015;**132**(18 Suppl 2):S315-67 doi: 10.1161/cir.0000000000000252[published Online First: Epub Date]].
21. Birkenes TS, Myklebust H, Neset A, et al. Quality of CPR performed by trained bystanders with optimized pre-arrival instructions. *Resuscitation* 2014;**85**(1):124-30 doi: 10.1016/j.resuscitation.2013.09.015[published Online First: Epub Date]].

- 1  
2  
3  
4  
5  
6  
7  
8  
9  
10  
11  
12  
13  
14  
15  
16  
17  
18  
19  
20  
21  
22  
23  
24  
25  
26  
27  
28  
29  
30  
31  
32  
33  
34  
35  
36  
37  
38  
39  
40  
41  
42  
43  
44  
45  
46  
47  
48  
49  
50  
51  
52  
53  
54  
55  
56  
57  
58  
59  
60
22. Lin Y-Y, Chiang W-C, Hsieh M-J, et al. Quality of audio-assisted versus video-assisted dispatcher-instructed bystander cardiopulmonary resuscitation: A systematic review and meta-analysis. *Resuscitation* 2018;**123**:77-85 doi: 10.1016/j.resuscitation.2017.12.010[published Online First: Epub Date]].
  23. Kovic I, Lulic I. Mobile phone in the chain of survival. *Resuscitation* 2011;**82**(6):776-9 doi: 10.1016/j.resuscitation.2011.02.014[published Online First: Epub Date]].
  24. Sasson C, Rogers MAM, Dahl J, et al. Predictors of Survival From Out-of-Hospital Cardiac Arrest. *Circulation: Cardiovascular Quality and Outcomes* 2010;**3**(1):63-81 doi: 10.1161/circoutcomes.109.889576[published Online First: Epub Date]].
  25. Wissenberg M, Lippert FK, Folke F, et al. Association of National Initiatives to Improve Cardiac Arrest Management With Rates of Bystander Intervention and Patient Survival After Out-of-Hospital Cardiac Arrest. *JAMA* 2013;**310**(13):1377-84 doi: 10.1001/jama.2013.278483[published Online First: Epub Date]].
  26. Johnsen E, Bolle SR. To see or not to see--better dispatcher-assisted CPR with video-calls? A qualitative study based on simulated trials. *Resuscitation* 2008;**78**(3):320-6 doi: 10.1016/j.resuscitation.2008.04.024[published Online First: Epub Date]].

**Table 1. Demographic characteristics of the participants.**

|                                      | <b>Total<br/>(N=186)</b> | <b>TCPRLink group<br/>(n=94)</b> | <b>T-CPR group<br/>(n=92)</b> | <b>P-<br/>value</b> |
|--------------------------------------|--------------------------|----------------------------------|-------------------------------|---------------------|
| Male (n, %)                          | 83 (44.6)                | 42 (44.7)                        | 41 (44.6)                     | 1.00                |
| Age                                  |                          |                                  |                               |                     |
| 18-24 years                          | 54 (27.0)                | 29 (30.9)                        | 25 (27.2)                     | 0.88                |
| 25-54 years                          | 75 (37.5)                | 37 (39.4)                        | 38 (41.3)                     |                     |
| 55-65 years                          | 57 (28.5)                | 28 (29.8)                        | 29 (31.5)                     |                     |
| Education status (n, %)              |                          |                                  |                               | 0.18                |
| ≤High school/ Junior college         | 68 (36.6)                | 30 (31.9)                        | 38 (41.3)                     |                     |
| College                              | 75 (40.3)                | 44 (46.8)                        | 31 (33.7)                     |                     |
| Master and Ph.D.                     | 43 (23.1)                | 20 (21.3)                        | 23 (25.0)                     |                     |
| Height (m, means ± SD)               | 1.68 ± 0.1               | 1.67 ± 0.1                       | 1.68 ± 0.1                    | 0.12                |
| Weight (kg, means ± SD)              | 64.5 ± 11.4              | 63.3 ± 10.3                      | 65.6 ± 12.4                   | 0.17                |
| BMI (kg/m <sup>2</sup> , means ± SD) | 22.9 ± 3.1               | 22.7 ± 2.8                       | 23.0 ± 3.4                    | 0.48                |

**Table 2. Lay rescuers CPR performance assessment in T-CPR simulation scenario.**

| T-CPR performance                                                                     | Phase I (N=186)          |                       |         | Phase II (N=170)            |                       |         |
|---------------------------------------------------------------------------------------|--------------------------|-----------------------|---------|-----------------------------|-----------------------|---------|
|                                                                                       | TCPRLink group<br>(n=94) | T-CPR group<br>(n=92) | P-value | TCPRLink<br>group<br>(n=86) | T-CPR group<br>(n=84) | P-value |
| <b>Counting with the dispatcher (n, %)</b>                                            | 20 (21.3)                | 38 (41.3)             | 0.003   | 6 (7.0)                     | 19 (22.6)             | 0.004   |
| <b>Time from call connected to...(seconds, means <math>\pm</math> SD)</b>             |                          |                       |         |                             |                       |         |
| Cardiac arrest identification                                                         | 98.2 $\pm$ 12.8          | 99.1 $\pm$ 16.9       | 0.68    | 101.7 $\pm$ 13.0            | 104.2 $\pm$ 15.0      | 0.25    |
| First chest compression                                                               | 143.6 $\pm$ 17.8         | 140.0 $\pm$ 25.8      | 0.27    | 149.7 $\pm$ 16.6            | 146.0 $\pm$ 20.2      | 0.19    |
| <b>CPR parameters [M(P<sub>25</sub>-P<sub>75</sub>) or means <math>\pm</math> SD]</b> |                          |                       |         |                             |                       |         |
| Total number of compressions                                                          | 661 (643-674)            | 648 (615-674)         | 0.035   | 661 (644-675)               | 646 (630-667)         | 0.002   |
| Average compression rate (min <sup>-1</sup> )                                         | 111 (109-113)            | 108 (103-112)         | 0.002   | 111 (109-113)               | 108 (105-112)         | <0.001  |
| Percentage of adequate rate (100-120 min <sup>-1</sup> , %)                           | 96 (89-98)               | 82 (50-97)            | <0.001  | 95 (78-98)                  | 93 (67-97)            | 0.11    |
| Average compression depth (mm)                                                        | 45.4 $\pm$ 8.8           | 43.6 $\pm$ 8.8        | 0.17    | 43.9 $\pm$ 9.1              | 42.9 $\pm$ 11.5       | 0.59    |
| Percentage of adequate depth (50-60mm, %)                                             | 20 (3-74)                | 12 (0-51)             | 0.14    | 17 (4-54)                   | 13 (0-57)             | 0.26    |
| Percentage of fully released (%)                                                      | 97 (72-100)              | 97 (69-100)           | 0.79    | 95 (54-100)                 | 96 (51-100)           | 0.40    |
| Average hands off time (s)                                                            | 0 (0-1)                  | 0 (0-1)               | 0.24    | 0 (0-1)                     | 0 (0-1)               | 0.72    |

Phase I tests were CPR performance and capabilities assessment using Telephone-assistant CPR (T-CPR) simulation scenario among individuals who have taken CPR training with/without TCPRLink APP.

Phase II tests were CPR skill retentions assessment among individuals with/without TCPRLink APP after three months.

**Table 3 Comparison of Lay rescuers CPR performance between TCPRLink group and T-CPR group by age. (Phase I)**

| TCPR performance                                                       | Age 18-24             |                    |                 | Age 25-54             |                    |                 | Age 55-65             |                    |                 |
|------------------------------------------------------------------------|-----------------------|--------------------|-----------------|-----------------------|--------------------|-----------------|-----------------------|--------------------|-----------------|
|                                                                        | TCPRLink group (n=29) | T-CPR group (n=25) | <i>P</i> -value | TCPRLink group (n=37) | T-CPR group (n=38) | <i>P</i> -value | TCPRLink group (n=28) | T-CPR group (n=29) | <i>P</i> -value |
| <b>Counting with the dispatcher (n, %)</b>                             | 9 (31.0)              | 12 (48.0)          | 0.20            | 7 (18.9)              | 19 (50.0)          | 0.005           | 4 (14.3)              | 7 (4.1)            | 0.35            |
| <b>Time from call connected to...(seconds, means ± SD)</b>             |                       |                    |                 |                       |                    |                 |                       |                    |                 |
| Cardiac arrest identification                                          | 98.9 ± 13.5           | 96.4 ± 19.5        | 0.58            | 97.0 ± 13.2           | 98.2 ± 14.0        | 0.72            | 98.9 ± 12.0           | 102.7 ± 17.8       | 0.36            |
| First chest compression                                                | 141.4 ± 20.2          | 137.8 ± 26.8       | 0.57            | 143.6 ± 17.7          | 135.9 ± 26.9       | 0.14            | 145.8 ± 15.4          | 147.1 ± 22.5       | 0.79            |
| <b>CPR parameters [M(P<sub>25</sub>-P<sub>75</sub>) or means ± SD]</b> |                       |                    |                 |                       |                    |                 |                       |                    |                 |
| Total number of compression                                            | 663(640-671)          | 650(608-666)       | 0.21            | 659(653-677)          | 652(632-674)       | 0.29            | 659(640-676)          | 640(612-672)       | 0.14            |
| Average compression rate (min <sup>-1</sup> )                          | 111(108-113)          | 108(101-112)       | 0.03            | 111(109-114)          | 109(106-113)       | 0.12            | 110(107-113)          | 107(103-113)       | 0.06            |
| Percentage of adequate rate (100-120 min <sup>-1</sup> , %)            | 95(88-99)             | 82(50-96)          | 0.01            | 97(90-98)             | 89(51-97)          | 0.006           | 95(88-97)             | 71(48-95)          | 0.003           |
| Average compression depth (mm)                                         | 41.8 ± 7.8            | 43.1 ± 6.6         | 0.49            | 46.9 ± 8.2            | 47.8 ± 8.1         | 0.67            | 47.1 ± 9.6            | 38.5 ± 8.7         | 0.001           |
| Percentage of adequate depth (50-60mm, %)                              | 8(0-28)               | 12(4-33)           | 0.37            | 25(9-84)              | 37(7-86)           | 0.92            | 45(1-99)              | 1(0-14)            | 0.002           |
| Percentage of fully released (%)                                       | 100(95-100)           | 100(96-100)        | 0.66            | 98(79-100)            | 95(57-99)          | 0.24            | 71(5-100)             | 96(37-100)         | 0.13            |
| Average hands off time (s)                                             | 0(0-2)                | 0(0-1)             | 0.24            | 0(0-1)                | 0(0-0)             | 0.45            | 0(0-1)                | 0(0-1)             | 0.92            |

Phase I tests were CPR performance and capabilities assessment using Telephone-assistant CPR (T-CPR) simulation scenario among individuals who have taken CPR training with/without TCPRLink APP.

**Table 4 Comparison of Lay rescuers CPR performance between TCPRLink group and T-CPR group by age. (Phase II)**

| TCPR performance                                                                      | Age 18-24             |                    |         | Age 25-54             |                    |         | Age 55-65             |                    |         |
|---------------------------------------------------------------------------------------|-----------------------|--------------------|---------|-----------------------|--------------------|---------|-----------------------|--------------------|---------|
|                                                                                       | TCPRLink group (n=29) | T-CPR group (n=23) | P-value | TCPRLink group (n=31) | T-CPR group (n=34) | P-value | TCPRLink group (n=26) | T-CPR group (n=27) | P-value |
| <b>Counting with the dispatcher (n, %)</b>                                            | 2 (6.9)               | 4 (17.4)           | 0.40    | 4 (12.9)              | 12 (35.3)          | 0.036   | 0 (0)                 | 3 (11.1)           | 0.24    |
| <b>Time from call connected to...(seconds, means <math>\pm</math> SD)</b>             |                       |                    |         |                       |                    |         |                       |                    |         |
| Cardiac arrest identification                                                         | 99.8 $\pm$ 16.0       | 100.4 $\pm$ 16.3   | 0.89    | 103.8 $\pm$ 13.6      | 103.0 $\pm$ 11.9   | 0.82    | 101.4 $\pm$ 7.3       | 108.9 $\pm$ 16.7   | 0.04    |
| First chest compression                                                               | 148.4 $\pm$ 20.1      | 144.2 $\pm$ 25.5   | 0.52    | 153.2 $\pm$ 17.3      | 143.6 $\pm$ 13.9   | 0.018   | 146.8 $\pm$ 9.8       | 150.4 $\pm$ 21.9   | 0.45    |
| <b>CPR parameters [M(P<sub>25</sub>-P<sub>75</sub>) or means <math>\pm</math> SD]</b> |                       |                    |         |                       |                    |         |                       |                    |         |
| Total number of compression                                                           | 658(643-678)          | 639(605-653)       | 0.004   | 665(653-675)          | 648(640-668)       | 0.09    | 663(644-676)          | 643(627-680)       | 0.32    |
| Average compression rate (min <sup>-1</sup> )                                         | 111(109-113)          | 107(101-110)       | <0.001  | 112(109-113)          | 109(107-112)       | 0.06    | 111(107-114)          | 109(105-114)       | 0.28    |
| Percentage of adequate rate (100-120 min <sup>-1</sup> , %)                           | 96(82-99)             | 82(60-98)          | 0.08    | 95(78-98)             | 95(84-97)          | 0.64    | 92(77-98)             | 90(70-97)          | 0.61    |
| Average compression depth (mm)                                                        | 41.7 $\pm$ 8.2        | 43.7 $\pm$ 14.1    | 0.55    | 45.2 $\pm$ 9.0        | 45.4 $\pm$ 9.6     | 0.92    | 44.7 $\pm$ 10.1       | 39.3 $\pm$ 10.8    | 0.07    |
| Percentage of adequate depth (50-60mm, %)                                             | 10(2-32)              | 10(0-54)           | 0.92    | 19(7-55)              | 22(2-81)           | 0.97    | 19(3-68)              | 2(0-24)            | 0.04    |
| Percentage of fully released (%)                                                      | 100(92-100)           | 99(91-100)         | 0.52    | 93(15-100)            | 90(44-99)          | 0.65    | 68(33-100)            | 89(24-99)          | 0.84    |
| Average hands off time (s)                                                            | 0(0-2)                | 0(0-1)             | 0.16    | 0(0-1)                | 0(0-1)             | 0.48    | 0(0-0)                | 0(0-0)             | 0.89    |

Phase II tests were CPR performance and capabilities assessment using Telephone-assistant CPR (T-CPR) simulation scenario among individuals who have taken CPR training with/without TCPRLink APP after three months.

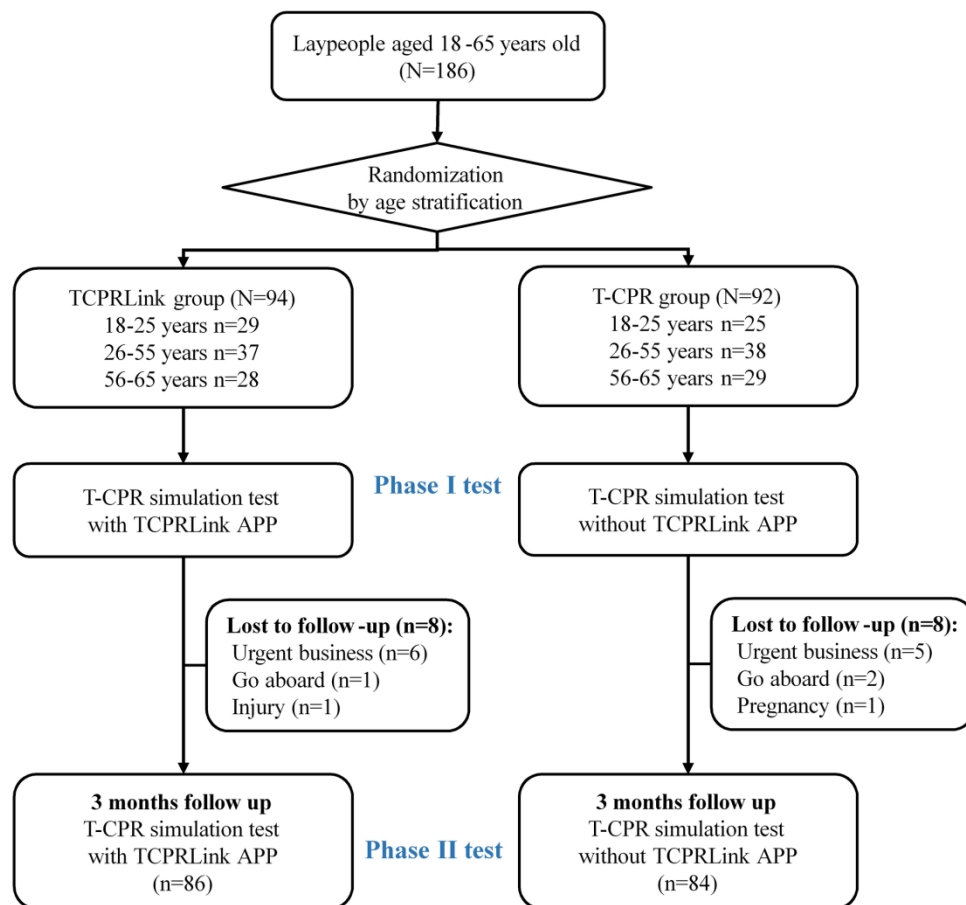

187x175mm (300 x 300 DPI)

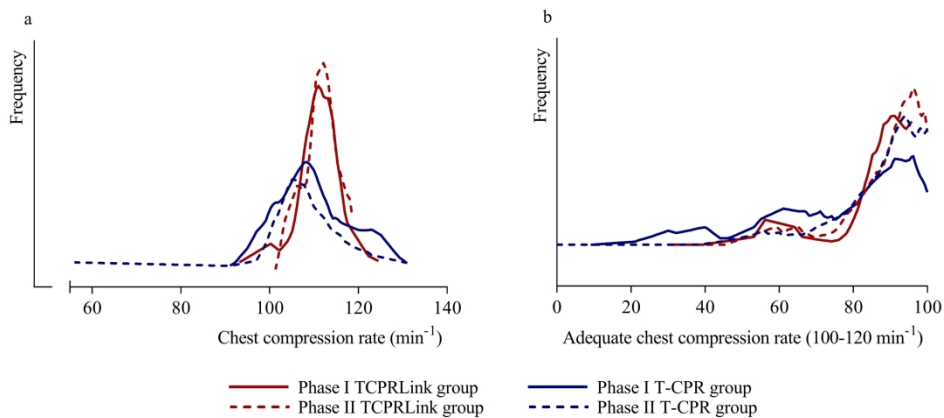

Figure 2. Distribution of the chest compression rate and the proportion of the adequate chest compression rate (100-120 min<sup>-1</sup>) in TCPRLink group and T-CPR group. Phase I test was conducted in T-CPR trained individuals with/without TCPRLink App after inclusion. Phase II test was conducted in the same individuals with/without TCPRLink App after three months.

269x117mm (300 x 300 DPI)



1  
2  
3  
4  
5  
6  
7  
8  
9  
10  
11  
12  
13  
14  
15  
16  
17  
18  
19  
20  
21  
22  
23  
24  
25  
26  
27  
28  
29  
30  
31  
32  
33  
34  
35  
36  
37  
38  
39  
40  
41  
42  
43  
44  
45  
46  
47  
48  
49  
50  
51  
52  
53  
54  
55  
56  
57  
58  
59  
60

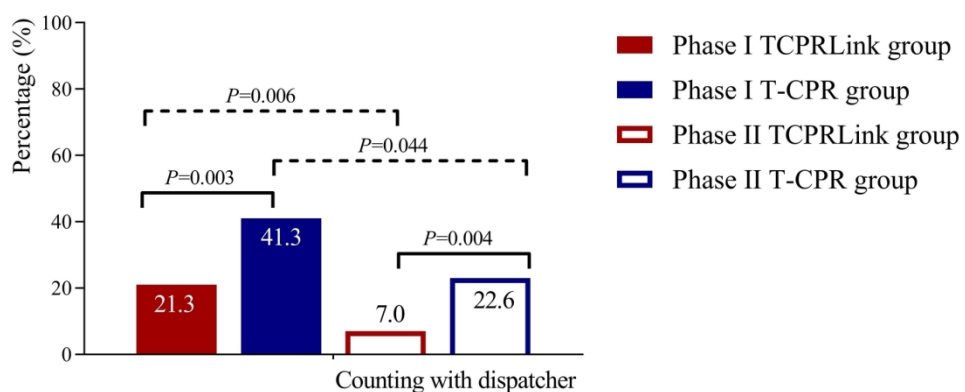

Figure 3. Counting with dispatcher in TCPRLink group and T-CPR group. Phase I test was conducted in T-CPR trained individuals with/without TCPRLink App after inclusion. Phase II test was conducted in the same individuals with/without TCPRLink App after three months.

152x66mm (300 x 300 DPI)

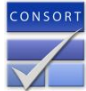

## CONSORT 2010 checklist of information to include when reporting a randomised trial\*

| Section/Topic                    | Item No | Checklist item                                                                                                                                                                              | Reported on page No |
|----------------------------------|---------|---------------------------------------------------------------------------------------------------------------------------------------------------------------------------------------------|---------------------|
| <b>Title and abstract</b>        |         |                                                                                                                                                                                             |                     |
|                                  | 1a      | Identification as a randomised trial in the title                                                                                                                                           | 1                   |
|                                  | 1b      | Structured summary of trial design, methods, results, and conclusions (for specific guidance see CONSORT for abstracts)                                                                     | 2                   |
| <b>Introduction</b>              |         |                                                                                                                                                                                             |                     |
| Background and objectives        | 2a      | Scientific background and explanation of rationale                                                                                                                                          | 4                   |
|                                  | 2b      | Specific objectives or hypotheses                                                                                                                                                           | 4                   |
| <b>Methods</b>                   |         |                                                                                                                                                                                             |                     |
| Trial design                     | 3a      | Description of trial design (such as parallel, factorial) including allocation ratio                                                                                                        | 5                   |
|                                  | 3b      | Important changes to methods after trial commencement (such as eligibility criteria), with reasons                                                                                          | 5                   |
| Participants                     | 4a      | Eligibility criteria for participants                                                                                                                                                       | 5                   |
|                                  | 4b      | Settings and locations where the data were collected                                                                                                                                        | 5                   |
| Interventions                    | 5       | The interventions for each group with sufficient details to allow replication, including how and when they were actually administered                                                       | 6                   |
| Outcomes                         | 6a      | Completely defined pre-specified primary and secondary outcome measures, including how and when they were assessed                                                                          | 7                   |
|                                  | 6b      | Any changes to trial outcomes after the trial commenced, with reasons                                                                                                                       | \                   |
| Sample size                      | 7a      | How sample size was determined                                                                                                                                                              | 5                   |
|                                  | 7b      | When applicable, explanation of any interim analyses and stopping guidelines                                                                                                                | \                   |
| <b>Randomisation:</b>            |         |                                                                                                                                                                                             |                     |
| Sequence generation              | 8a      | Method used to generate the random allocation sequence                                                                                                                                      | 5                   |
|                                  | 8b      | Type of randomisation; details of any restriction (such as blocking and block size)                                                                                                         | 5                   |
| Allocation concealment mechanism | 9       | Mechanism used to implement the random allocation sequence (such as sequentially numbered containers), describing any steps taken to conceal the sequence until interventions were assigned | \                   |
| Implementation                   | 10      | Who generated the random allocation sequence, who enrolled participants, and who assigned participants to interventions                                                                     | 5                   |
| Blinding                         | 11a     | If done, who was blinded after assignment to interventions (for example, participants, care providers, those                                                                                | \                   |

|    |                          |                                                             |                                                                                                                  |             |
|----|--------------------------|-------------------------------------------------------------|------------------------------------------------------------------------------------------------------------------|-------------|
| 1  |                          | assessing outcomes) and how                                 |                                                                                                                  |             |
| 2  | 11b                      | If relevant, description of the similarity of interventions | \                                                                                                                |             |
| 3  | Statistical methods      | 12a                                                         | Statistical methods used to compare groups for primary and secondary outcomes                                    | 7           |
| 4  |                          | 12b                                                         | Methods for additional analyses, such as subgroup analyses and adjusted analyses                                 | 7           |
| 5  |                          |                                                             |                                                                                                                  |             |
| 6  | <b>Results</b>           |                                                             |                                                                                                                  |             |
| 7  | Participant flow (a      | 13a                                                         | For each group, the numbers of participants who were randomly assigned, received intended treatment, and         | 8, Figure 1 |
| 8  | diagram is strongly      |                                                             | were analysed for the primary outcome                                                                            |             |
| 9  | recommended)             | 13b                                                         | For each group, losses and exclusions after randomisation, together with reasons                                 | Figure 1    |
| 10 | Recruitment              | 14a                                                         | Dates defining the periods of recruitment and follow-up                                                          | 5           |
| 11 |                          | 14b                                                         | Why the trial ended or was stopped                                                                               | \           |
| 12 | Baseline data            | 15                                                          | A table showing baseline demographic and clinical characteristics for each group                                 | 15          |
| 13 | Numbers analysed         | 16                                                          | For each group, number of participants (denominator) included in each analysis and whether the analysis was      | 15          |
| 14 |                          |                                                             | by original assigned groups                                                                                      |             |
| 15 | Outcomes and             | 17a                                                         | For each primary and secondary outcome, results for each group, and the estimated effect size and its            | 16          |
| 16 | estimation               |                                                             | precision (such as 95% confidence interval)                                                                      |             |
| 17 |                          | 17b                                                         | For binary outcomes, presentation of both absolute and relative effect sizes is recommended                      | \           |
| 18 | Ancillary analyses       | 18                                                          | Results of any other analyses performed, including subgroup analyses and adjusted analyses, distinguishing       | 17,18       |
| 19 |                          |                                                             | pre-specified from exploratory                                                                                   |             |
| 20 | Harms                    | 19                                                          | All important harms or unintended effects in each group (for specific guidance see CONSORT for harms)            | \           |
| 21 |                          |                                                             |                                                                                                                  |             |
| 22 | <b>Discussion</b>        |                                                             |                                                                                                                  |             |
| 23 | Limitations              | 20                                                          | Trial limitations, addressing sources of potential bias, imprecision, and, if relevant, multiplicity of analyses | 10          |
| 24 | Generalisability         | 21                                                          | Generalisability (external validity, applicability) of the trial findings                                        | 8-10        |
| 25 | Interpretation           | 22                                                          | Interpretation consistent with results, balancing benefits and harms, and considering other relevant evidence    | 8-10        |
| 26 |                          |                                                             |                                                                                                                  |             |
| 27 | <b>Other information</b> |                                                             |                                                                                                                  |             |
| 28 | Registration             | 23                                                          | Registration number and name of trial registry                                                                   | \           |
| 29 | Protocol                 | 24                                                          | Where the full trial protocol can be accessed, if available                                                      | \           |
| 30 | Funding                  | 25                                                          | Sources of funding and other support (such as supply of drugs), role of funders                                  | 1           |

36  
37 \*We strongly recommend reading this statement in conjunction with the CONSORT 2010 Explanation and Elaboration for important clarifications on all the items. If relevant, we also  
38 recommend reading CONSORT extensions for cluster randomised trials, non-inferiority and equivalence trials, non-pharmacological treatments, herbal interventions, and pragmatic trials.  
39 Additional extensions are forthcoming: for those and for up to date references relevant to this checklist, see [www.consort-statement.org](http://www.consort-statement.org).  
40  
41  
42

# BMJ Open

## Effect of a Real-Time Feedback Smartphone Application (TCPRLink) on the Quality of Telephone-assisted CPR Performed by trained laypeople in China: A manikin-based randomized controlled study

|                                 |                                                                                                                                                                                                                                                                                                                             |
|---------------------------------|-----------------------------------------------------------------------------------------------------------------------------------------------------------------------------------------------------------------------------------------------------------------------------------------------------------------------------|
| Journal:                        | <i>BMJ Open</i>                                                                                                                                                                                                                                                                                                             |
| Manuscript ID                   | bmjopen-2020-038813.R1                                                                                                                                                                                                                                                                                                      |
| Article Type:                   | Original research                                                                                                                                                                                                                                                                                                           |
| Date Submitted by the Author:   | 12-Aug-2020                                                                                                                                                                                                                                                                                                                 |
| Complete List of Authors:       | Dong, Xuejie; Shanghai Jiao Tong University School of Public Health, Zhang, Lin; Shanghai Jiao Tong University School of Public Health, Myklebust, Helge; Laerdal Medical Cooperation Birkenes, Tonje; Laerdal Medical Cooperation Zheng, Zhi-Jie ; Peking University, Department of Global Health, School of Public Health |
| <b>Primary Subject Heading</b>: | Emergency medicine                                                                                                                                                                                                                                                                                                          |
| Secondary Subject Heading:      | Public health                                                                                                                                                                                                                                                                                                               |
| Keywords:                       | ACCIDENT & EMERGENCY MEDICINE, PUBLIC HEALTH, Telemedicine < BIOTECHNOLOGY & BIOINFORMATICS                                                                                                                                                                                                                                 |
|                                 |                                                                                                                                                                                                                                                                                                                             |

SCHOLARONE™  
Manuscripts

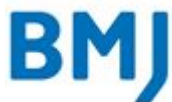

I, the Submitting Author has the right to grant and does grant on behalf of all authors of the Work (as defined in the below author licence), an exclusive licence and/or a non-exclusive licence for contributions from authors who are: i) UK Crown employees; ii) where BMJ has agreed a CC-BY licence shall apply, and/or iii) in accordance with the terms applicable for US Federal Government officers or employees acting as part of their official duties; on a worldwide, perpetual, irrevocable, royalty-free basis to BMJ Publishing Group Ltd ("BMJ") its licensees and where the relevant Journal is co-owned by BMJ to the co-owners of the Journal, to publish the Work in this journal and any other BMJ products and to exploit all rights, as set out in our [licence](#).

The Submitting Author accepts and understands that any supply made under these terms is made by BMJ to the Submitting Author unless you are acting as an employee on behalf of your employer or a postgraduate student of an affiliated institution which is paying any applicable article publishing charge ("APC") for Open Access articles. Where the Submitting Author wishes to make the Work available on an Open Access basis (and intends to pay the relevant APC), the terms of reuse of such Open Access shall be governed by a Creative Commons licence – details of these licences and which [Creative Commons](#) licence will apply to this Work are set out in our licence referred to above.

Other than as permitted in any relevant BMJ Author's Self Archiving Policies, I confirm this Work has not been accepted for publication elsewhere, is not being considered for publication elsewhere and does not duplicate material already published. I confirm all authors consent to publication of this Work and authorise the granting of this licence.

1  
2  
3  
4 **1 Effect of a Real-Time Feedback Smartphone Application (TCPRLink) on the**  
5  
6 **2 Quality of Telephone-assisted CPR Performed by trained laypeople in China: A**  
7  
8 **3 manikin-based randomized controlled study**

10  
11 4 Xuejie Dong<sup>1#</sup>, Lin Zhang<sup>1\*#</sup>, Helge Myklebust<sup>2</sup>, Tonje Soraas Birkenes<sup>2</sup>, Zhi-Jie  
12  
13 5 Zheng<sup>3</sup>

15 6 1. Shanghai Jiao Tong University School of Public Health

16  
17 7 2. Laerdal Medical, Norway

18  
19 8 3. Peking University School of Public Health

20  
21 9

22  
23 10 # XJ Dong and L Zhang contributed equally to this article.

24  
25 11

26  
27 12 **\*Correspondence and reprint request to:** Lin Zhang, Ph.D., Assistant Professor of  
28  
29 13 Epidemiology, Shanghai Jiao Tong University School of Public Health, 227 South  
30  
31 14 Chongqing Road, Shanghai, 200025, China, e-mail: [zhanglynn@sjtu.edu.cn](mailto:zhanglynn@sjtu.edu.cn).

32  
33 15

34  
35 16 **Word count: 3210**

36  
37 17 **Number of figures: 4**

38  
39 18 **Number of tables: 4**

40  
41  
42  
43  
44 19

1  
2  
3 20 **ABSTRACT**  
4

5 21 **Objectives:** To determine the effect of a free smartphone application (TCPRLink) that  
6 22 provides real-time monitoring and audiovisual feedback on chest compressions (CC)  
7 23 on trained layperson telephone-assisted cardiopulmonary resuscitation (T-CPR)  
8 24 performance.

9 25 **Design:** A manikin-based randomized controlled study.

10 26 **Setting:** This study was conducted at a multidisciplinary university and a community  
11 27 center in China.

12 28 **Participants:** One hundred and eighty-six adult participants (age 18-65 years) with T-  
13 29 CPR training experience were randomly assigned to the TCPRLink (n=94) and T-CPR  
14 30 (n=92) groups with age stratification.

15 31 **Interventions:** We compared the participants' performance for 6-minutes of CC in a  
16 32 simulated T-CPR scenario both at the baseline and after 3 months.

17 33 **Primary and secondary outcome measures:** The primary outcomes were the CC rate  
18 34 and proportion of adequate CC rate (100–120 min<sup>-1</sup>). The secondary outcomes included  
19 35 the proportion of participants counting the CC rhythm, time to first CC, CC depth,  
20 36 hands-off time, and CC full-release ratio.

21 37 **Results:** Participants in the TCPRLink feedback group more consistently performed  
22 38 CC with higher rate, both initially and 3 month later [median 111 (IQR 109–113) vs.  
23 39 108 (103–112) min<sup>-1</sup>, *P*=0.002 and 111 (109–113) vs. 108 (105–112) min<sup>-1</sup>, *P*<0.001,  
24 40 respectively], with less need to count the rhythm [21.3% vs. 41.3%, *P*=0.003 and 7%  
25 41 vs. 22.6%, *P*=0.004, respectively] compared with the T-CPR group. There were no  
26 42 significant differences in time to the first CC, hands-off time, or CC full-release ratio.  
27 43 Among 55-65 year group, the CC depth was deeper in the TCPRLink group than in the  
28 44 TCPR group (47.1±9.6 vs 38.5±8.7 mm, *P*=0.001, and 44.7±10.1 vs 39.3±10.8 mm,  
29 45 *P*=0.07, respectively).

30 46 **Conclusions:** The TCPRLink application improved T-CPR quality in trained  
31 47 laypersons to provide more effective CCs and lighten the load of counting out the CC  
32 48 with the dispatcher in a simulated T-CPR scenario. Further investigations are required  
33 49 to confirm this effectiveness in real-life resuscitation attempts.

34 50

35 51

1  
2  
3 **52 Strengths and limitations of this study**  
4  
5

- 6 53 • The effectiveness of a real-time feedback smartphone application (TCPRLink)  
7 was evaluated in a telephone-assisted CPR (T-CPR) simulation among  
8 54 participants from the Chinese general population.  
9  
10 55  
11 56 • Trained adult laypersons (age range 18–65 years) participated in this study to  
12 facilitate the identification of discrepancies in T-CPR performance among  
13 57 different age groups.  
14  
15 58  
16 59 • The study included a 3-month follow-up T-CPR performance test to investigate  
17 the participants' skill retention.  
18 60  
19  
20 61 • The Hawthorn effect could not be excluded in the simulation scenario, with the  
21 possibility of a motivation bias.  
22 62  
23  
24 63  
25  
26  
27  
28  
29  
30  
31  
32  
33  
34  
35  
36  
37  
38  
39  
40  
41  
42  
43  
44  
45  
46  
47  
48  
49  
50  
51  
52  
53  
54  
55  
56  
57  
58  
59  
60



## 64 INTRODUCTION

65 Bystander-provided immediate and adequate cardiopulmonary resuscitation (CPR) can  
66 directly impact patient outcomes following an out-of-hospital cardiac arrest.[1-3] The  
67 updated guidelines of the American Heart Association (AHA) and European  
68 Resuscitation Council (ERC) state that telephone-assisted CPR (T-CPR) has a positive  
69 effect on the entire resuscitation process by getting more callers to start CPR and  
70 through coaching the callers to provide effective CPR.[4, 5] Despite significant  
71 advances in the T-CPR instructions during the resuscitation procedures, here exists a  
72 blind zone between the dispatcher and caller. The dispatcher is voice connected to the  
73 caller via the phone, but is unable to see the patient and evaluate the quality of bystander  
74 CPR. Therefore, new strategies to address this challenge are needed.

75 The ubiquitous presence and utilization of smartphones suggest a novel opportunity to  
76 improve resuscitation care through the measurement of bystander CPR metrics.[6-12]  
77 In a recent statement from the AHA and ERC, the use of digital strategies, such as  
78 mobile devices, were encouraged to provide bystanders with an accelerometer to  
79 measure CPR metrics.[13, 14] In adherence to these guidelines, an audiovisual  
80 smartphone application (TCPRLink) was developed to facilitate high-quality  
81 bystander-provided CPR and assist the dispatcher to evaluate the CPR quality in real  
82 time.[15] The TCPRLink application utilizes the smartphone front camera to detect  
83 chest compressions (CC) and displays the CC rate to the bystanders and simultaneously  
84 sends the real-time CC rate and the time without compressions via the internet to a  
85 monitor that is in front of the dispatcher.

86 This study was conducted to evaluate the effectiveness of the TCPRLink application  
87 with real-time audiovisual feedback in dispatcher-assisted CPR during a cardiac arrest  
88 simulation. We hypothesized that this smartphone-based CC rate feedback application  
89 would improve the quality of CPR in the general population compared to the use of  
90 conventional T-CPR instructions.

## 91 METHODS

### 92 Study design and ethics

93 This study was a simulation-based randomized experimental trial that was carried out  
94 from September 1, 2018 to May 30, 2019. We obtained ethical approval from the Joint  
95 Research Ethics Board of the Shanghai Jiao Tong University Schools of Public Health  
96 and Nursing (approval no. SJUPN-201714) for study conduct. All participants were  
97 verbally informed about the purpose of the study and provided written informed consent.  
98 They were informed that their T-CPR performance would be tested and video-recorded  
99 in a simulated scenario after training and, again, 3 months later.

### 100 **Study population**

101 We randomly recruited 186 participants from those who participated in the “WeCan  
102 CPR” training program [16] an initiative of the China Resuscitation Academy. College  
103 students and adult laypersons (age range 18–65 years) who had completed the training  
104 program within one week were eligible for study enrolment. Physicians, nurses,  
105 dispatchers, and other healthcare professionals were excluded from the study.

106 The WeCan CPR course is a video-based, 1-hour training program on applying  
107 dispatcher-telephone-guided CPR training in combination with practical and basic CPR  
108 training that is targeted at potential bystanders. Participants learn how to call the  
109 emergency dispatch center, follow the procedure of the T-CPR instructions, and  
110 perform hands-only CPR. All trainees performed at least 550 CC on instrumented  
111 feedback manikins (QCPR Classroom, Laerdal Medical, Norway) during the training.

### 112 **Patient and public involvement**

113 Patients or the public were not involved in the design, or conduct, or reporting, or  
114 dissemination of our research.

### 115 **Randomization**

116 Randomization was stratified by age groups (18–24, 25–54, and 55–65 years) and  
117 conducted to ensure equal distribution of participants across study arms. Participants  
118 were randomized into either the control arm (conventional T-CPR group) or  
119 interventional arm (T-CPR with the TCPRLink group). All participants were informed  
120 the purpose of the study, which was to assess the impact of the TCPRLink App on  
121 resuscitation performance, and were not blinded to the study-arm allocation due to the  
122 nature of the intervention.

### 123 **TCPRLink application**

124 TCPRLink (University of Stavanger and Laerdal Medical, Norway) is a free, CPR  
125 audiovisual feedback smartphone application that was designed to measure the CC rate  
126 and hands-off time and to provide feedback to the *bystander* and the *dispatcher*. The  
127 accuracy and validation of the TCPRLink app has been demonstrated earlier. [17]

128 The illustration of the application in use is presented in **Figure 1**. By clicking the “Press  
129 to start TCPR Link” button, the application activates the speaker, establishes a  
130 telephone connection with the dispatcher, activates the TCPRLink app which captures  
131 and analyzes the CPR movement via the front facing camera of the smartphone in real  
132 time, and simultaneously sends the location and real-time compression data to a web  
133 server which is available for the dispatcher (web server:  
134 <http://tcpmlink.azurewebsites.net/?%20country=china>).

135 At the bystander interface, a speedometer displayed on the smartphone screen next to a  
136 preview frame allows the bystander to keep track of the CC rate, which is obtained by  
137 analyzing body movement. Thus, the individual receives real-time objective feedback  
138 via the speedometer (with the indicator in the green or yellow range of 100–120 and  
139 <100 or >120 compressions/minute, respectively).

140 Similarly, at the dispatcher’s interface, real-time objective feedback is presented during  
141 the emergency call via a sliding window from a website presented on a computer screen  
142 that shows the history and progression of the CC rate. Guided by the indicator on web  
143 server, the dispatcher can further guided the bystander-rendered CC rate through direct  
144 instructions to "push faster", "push slower", or “don’t stop”.

### 145 **Study procedures**

146 The T-CPR performance of all participants were evaluated twice. The first evaluation  
147 (Phase I test) was conducted within one week of WeCanCPR training in a cardiac arrest  
148 T-CPR simulated scenario, and the second occurred 3 months later (Phase II test) and  
149 corresponded to the same setting as the initial test.

150 The simulations were performed in a quiet, isolated, designated room with a manikin  
151 placed on the floor. Individuals were asked to enter the room alone, make an emergency  
152 call to an assigned phone number, and try their best to rescue the manikin in a cardiac

1  
2  
3 153 arrest T-CPR simulated scenario. T-CPR instructions were strictly standardized using  
4  
5 154 the Medical Priority Dispatch System (MPDS version 12.1, Salt Lake City, US) OHCA  
6  
7 155 dispatch protocol.[18] One dispatcher who had 6 years of T-CPR experience from  
8  
9 156 working at the local emergency dispatch center acted as dispatcher in the simulation.

10  
11 157 During T-CPR calls, individuals were asked for their current address, patient's age and  
12  
13 158 gender, patient's consciousness level, and breathing status in accordance with the  
14  
15 159 MPDS protocol. Then, individuals were instructed by the dispatcher to activate the  
16  
17 160 speaker and place their phone on the floor by the manikin. The dispatcher followed a  
18  
19 161 standard procedure to initiate CPR and let the participant perform hands-only CPR for  
20  
21 162 6 minutes. For encouragement, the dispatcher counted the CC rhythm with the  
22  
23 163 participants and said "good job, push harder" every 30 seconds during the simulation.

24  
25 164 For the conventional T-CPR group, the participants received no visual feedback from  
26  
27 165 the smartphone and were guided only by the dispatcher instructions. For the TCPRLink  
28  
29 166 group, individuals were asked to call for help using the TCPRLink app. The  
30  
31 167 participants' behavior and performance during the simulation exercise were recorded  
32  
33 168 by a separate video camera that faced toward the manikin and was located 80 cm above  
34  
35 169 the ground and 1.5 m away for a panoramic shot.

### 36 170 **Outcome measures**

37  
38 171 The primary outcomes measured were the CC rate and the proportion of the adequate  
39  
40 172 CC meeting the guideline-recommended rate (100–120 min<sup>-1</sup>) [19, 20] during 6 minutes  
41  
42 173 of hands-only CPR. The secondary outcomes were CC depth, the proportion of CC with  
43  
44 174 the adequate CC depth (5–6 cm), the proportion of CC with complete recoil (complete  
45  
46 175 release recoil of the chest between compressions), and the absolute hands-off time (the  
47  
48 176 sum of all periods during which there was no hand compression of the chest) during the  
49  
50 177 6 minutes of hands-only CC. The abovementioned parameters of CCs effectiveness  
51  
52 178 were monitored using the proprietary software for the ResusciAnne<sup>®</sup> QCPR manikin  
53  
54 179 (Laerdal Medical, Norway).

55  
56 180 The video recording of the simulation scenario was used to evaluate individual  
57  
58 181 participant behaviors, including the communication with the dispatcher (counting the  
59  
60 182 CC rhythms with the dispatcher) and time to first CC (time interval from call connection  
183 to first CC). We documented the age, sex, education level, self-reported body weight,

184 and height of all participants.

### 185 **Sample size estimation**

186 The sample size calculation was followed to sequentially recruit 68 participants (34 in  
187 the TCPRLink group with 12, 11, and 11 participants in the 18–24, 25–54, and 55–65  
188 years age range, respectively, and 34 in the T-CPR group with 11, 12, and 11  
189 participants in the 18–24, 25–54, and 55–65 years age range, respectively) in the Phase  
190 I test. A change in the proportion of adequate CC by >5% was considered to be a  
191 relevant difference. With a statistical power of 90% and two-sided alpha level of 0.05,  
192 the minimum numbers of participants required in the TCPRLink/T-CPR group among  
193 the different age groups were 20 (18–24 years), 26 (25–54 years), and 18 (55–65 years),  
194 respectively. Considering the possibility of 20% loss to follow-up and the participants’  
195 availability, we recruited 54, 75, and 57 participants in the age ranges of 18–24, 25–54,  
196 and 55–65 years, respectively.

### 197 **Statistical analysis**

198 Data are presented as frequencies with percentages for categorical variables and mean  
199  $\pm$  standard deviation or median (interquartile range, IQR; M [P<sub>25</sub>-P<sub>75</sub>]) for continuous  
200 variables. Normal distribution was confirmed using the Kolmogorov–Smirnov test.  
201 Intergroup differences in the outcomes for the categorical variables were assessed using  
202 the chi-square or Fisher’s exact test. Independent Student *t*-tests were conducted to  
203 explore the effect of the intervention for continuous variables with normal distribution,  
204 and Mann–Whitney *U*-test was used for variables with nonparametric distribution  
205 between the control and intervention arm. All analyses were conducted using SPSS  
206 22.0. All *P*-values were 2-sided, and *P* < 0.05 was considered to be statistically  
207 significant.

## 208 **RESULTS**

209 A total of 186 participants (94 in T-CPR with TCPRLink group and 92 in conventional  
210 T-CPR group) were included in this study. The demographic characteristics are shown  
211 in **Table 1**. Age, gender, education level, and body mass index (BMI) did not differ  
212 between the groups. Eight participants in each study arm were lost to follow-up after  
213 the initial test (**Figure 2**).

214 During the 6 minutes of hands-only CPR, individuals in the TCPRLink group  
215 performed CC with a higher rate, both initially [median 111 (IQR 109–113) vs. 108  
216 (103–112) min<sup>-1</sup>, *P*=0.002] and at the 3-month re-test [111 (109–113) vs. 108 (105–112)  
217 min<sup>-1</sup>, *P*<0.001], compared to the conventional T-CPR group, respectively (**Table 2**  
218 **and Figure 3**). In the TCPRLink group where the CC rate speedometer was displayed,  
219 individuals were less likely to count out the CC rhythms with the dispatcher (21.3% vs.  
220 41.3%, *P*=0.003 and 7% vs. 22.6%, *P*=0.004, respectively) (**Table 2 and Figure 4**).  
221 Hands-off times, CC full-release ratio, and time to first CC did not statistically differ  
222 between the study groups either initially or at 3 months follow-up.

223 The depth of CCs in the TCPRLink group was significantly deeper in the age group of  
224 55–65 years ( $47.1 \pm 9.6$  vs.  $38.5 \pm 8.7$  mm, *P*=0.001) than in the control group in the  
225 Phase I test (**Table 3**). However, the CC depth showed a tendency to be deeper in  
226 TCPRLink group but the difference was not statistically significant in the Phase II test  
227 conducted 3 months later ( $44.7 \pm 10.1$  vs.  $39.3 \pm 10.8$  mm, *P*=0.07; **Table 4**).

## 228 DISCUSSION

229 This study evaluated a novel, digital invention that integrated an audiovisual feedback  
230 smartphone application and a web-based system, thereby combining real-time  
231 dispatcher instructions and real-time feedback to ensure the appropriate quality of CPR.  
232 We compared the quality of T-CPR performed by potential bystander-rescuers in the  
233 age range of 18–65 years in a cardiac arrest simulation scenario with or without the  
234 smartphone application. The results of this study showed that real-time, audiovisual  
235 feedback using a smartphone application and web-based system in combination with  
236 dispatcher instructions augmented the interaction between dispatchers and bystanders  
237 with a resultant positive effect on the quality of bystander-rendered CPR.

238 Dispatchers may coach callers to perform CPR, although they rely on audio  
239 communication alone to understand what is happening. With no other means of  
240 feedback, depending on the dispatcher's instructions may lead to lower quality CC and  
241 more hands-off time.[21] Several experimental manikin studies have demonstrated the  
242 potential benefits and drawbacks of video-assisted communication between rescuers  
243 and dispatchers compared to that of the conventional audio-instructed practice with  
244 regard to the CC rate and hand position.[22–26] In a recent study that compared the



1  
2  
3 245 real-world effects of video- or audio-instructed T-CPR on the resuscitation outcomes,  
4  
5 246 video-instructed T-CPR caused no delay in initiating CC although it was not associated  
6  
7 247 with improvement in the survival rates.[27]  
8

9 248 In dispatch-assisted instructions, the smartphone has secured a role as a promising  
10  
11 249 carrier to improve video resuscitation care with its wide availability and high  
12  
13 250 communication capabilities. Several diversified, advanced smartphone applications  
14  
15 251 have been developed for integration into the links of the chain of survival and have  
16  
17 252 feasibly created a strengthened "Mobile chain of survival" [28] as shown previously.  
18  
19 253 One kind of application guides users in their CPR procedures via text and pictures or  
20  
21 254 provides video examples of CPR with metronomic guidance that a bystander could  
22  
23 255 watch before or during an actual resuscitation.[6, 8] Another application provides  
24  
25 256 measurement of CPR quality and feedback based on motion-sensing which require the  
26  
27 257 user to place the phone on the patient's chest or hold it between the rescuer's hands  
28  
29 258 while performing CPR.[9-12] However, these previous smartphone solutions have  
30  
31 259 neglected the potential to leverage the dispatcher's involvement and, therefore, may be  
32  
33 260 less suitable for real-life emergencies as the phone connection may be accidentally lost  
34  
35 261 when using the phone as a CPR feedback device.

36  
37 262 Given its salient differences with regard to the other smartphone applications, the  
38  
39 263 TCPRLink application could improve the effectiveness of T-CPR, both on the  
40  
41 264 dispatcher instruction and bystander operation aspects. The TCPRLink application  
42  
43 265 utilizes the smartphone front facing camera for continuous quality improvement  
44  
45 266 through real-time feedback for the bystander and the dispatcher. Dispatcher could  
46  
47 267 monitor the hands-off time and encourage the bystander to continue CPR when they  
48  
49 268 experience fatigue. Therefore, this application may be suitable for real-world  
50  
51 269 emergencies when considering the prolonged time to call the dispatch center and start  
52  
53 270 CC, and that phone connection may be accidentally lost when using the phone as a CPR  
54  
55 271 feedback device. [29]

56  
57 272 As the risk of OHCA increases with age, [30, 31] older adults are more likely to be  
58  
59 273 bystanders when their spouse or a family member experiences a cardiac arrest. The  
60  
274 CPR capability of older adults has always been a significant concern. Another study  
275 that evaluated the effectiveness of a smartphone CPR application showed that

1  
2  
3 276 participants aged over 60 years could not sustain long-duration CPR. [9] However, in  
4 277 contrast with the results of that study, our study showed that TCPRLink app used with  
5 278 dispatcher assistance caused extra stimulus among seniors aged 55-65 as indicated by  
6  
7 279 the subgroup analysis, with comparable quality of CPR with that of the younger  
8  
9 280 participants during the 6 minutes of hands-only CPR. Moreover, providing a feasible  
10  
11 281 CPR feedback devices for seniors might be an appropriate approach to increase not only  
12  
13 282 their ability, but also their willingness and confidence to do CPR. [9] When guided by  
14  
15 283 the TCPRLink application, the CC rate and depth of CPR performed by older  
16  
17 284 participants were both better and in adherence to the guidelines when compared with  
18  
19 285 that in the conventional T-CPR group. These data suggest that, with the two-way metric  
20  
21 286 of CPR quality and dispatcher encouragement, older participants performed CPR  
22  
23 287 equally well as did the younger generation.

24  
25 288 Counting aloud is the commonest method by which the dispatcher can ensure an  
26  
27 289 appropriate CC rate in T-CPR. Without feedback from the rescuer, the dispatcher's  
28  
29 290 understanding of the rescuer's situation is poor. [32] Interestingly, we found that visual  
30  
31 291 guidance of the CC rate from the speedometer on the smartphone reduced the need to  
32  
33 292 count the number of CC aloud to maintain an appropriate rate. Thus, rescuers could  
34  
35 293 expend more energy on compression and less on counting. Furthermore, a lesser need  
36  
37 294 for counting in the dispatcher's protocol leaves more time to coach for compression  
38  
39 295 depth and avoiding leaning. Contrary to the common concern that the use of mobile  
40  
41 296 devices or smartphone applications to improve CPR quality might cause a delay in the  
42  
43 297 initiation of CCs, [8, 10] the time to the first CC in the TCPRLink group was not  
44  
45 298 prolonged as compared with that in the conventional T-CPR group in this study.

46  
47 299 Nevertheless, some limitations of this study need to be mentioned. On the one hand,  
48  
49 300 this study was implemented in a simulated environment which may not reflect the real-  
50  
51 301 world scenario. The Hawthorn effect could not be excluded under the simulation  
52  
53 302 scenario, and could result in a motivation bias. Therefore, this study followed a realistic  
54  
55 303 approach to the simulation of bystander CPR in a cardiac arrest scenario. We invited a  
56  
57 304 senior dispatcher who worked in the emergency dispatch center to portray the T-CPR  
58  
59 305 scenario. On the other hand, a manikin may not represent the diversity of patients'  
60  
306 chests and the changes in chest resistance during extended CPR. Lastly, we recruited  
307  
voluntary participants aged between 18 and 65 years who attended the "WeCan CPR"



1  
2  
3 308 training project. Therefore, the participants of this study might have had a selection bias  
4  
5 309 as they had a positive willingness and knowledge of CPR training. We found that  
6  
7 310 elderly individuals older than 65 years were less likely to participate, considering their  
8  
9 311 physical capacity. The mean age of participants was nearly 40 years, which might not  
10  
11 312 be the representative age for bystanders in real life.

## 12 313 **Conclusions**

13  
14 314 The TCPRLink smartphone application provides real-time feedback to both rescuer and  
15  
16 315 dispatcher to enable more effective CC and lighten the load of counting out the CC with  
17  
18 316 the dispatcher in a simulated T-CPR scenario. Further investigations are required to  
19  
20 317 confirm the effectiveness of this application in the real-life resuscitation scenario.

21  
22 318

23  
24 319 **Acknowledgments:** We would like to acknowledge the participants from Shanghai  
25  
26 320 Jiao Tong University and the Chaoyang community for their time and active  
27  
28 321 involvement in this study.

29  
30 322 **Authors' contributions:** XJ Dong and L Zhang contributed equally to this article. L  
31  
32 323 Zhang conceptualized the study. XJ Dong and L Zhang performed the data collection  
33  
34 324 and analysis. XJ Dong and L Zhang contributed to manuscript writing. L Zhang, H  
35  
36 325 Myklebust, TS Birkenes, and Z-J Zheng provided administrative advice and  
37  
38 326 consultation. H Myklebust, TS Birkenes, and Z-J Zheng critically revised the final  
39  
40 327 version. All authors approved the final version of the manuscript.

41  
42 328 **Competing interests:** All of the authors declare that they have no potential or actual  
43  
44 329 conflicts of interest. H Myklebust and TS Birkenes are employees at Laerdal Medical.  
45  
46 330 The manufacturer (Laerdal Medical, Norway) does not have any conflicts of interest  
47  
48 331 with regard to the trial or in the interpretation of the results.

49  
50 332 **Data availability statement:** Data are available on reasonable request.

51  
52 333 **Research ethics approval:** The study protocol was approved by the Joint Research  
53  
54 334 Ethics Board of the Shanghai Jiao Tong University Schools of Public Health and  
55  
56 335 Nursing (approval ID SJUPN-201714).

1  
2  
3 336 **Funding:** This research was funded by the National Natural Science Foundation of  
4  
5 337 China (Grant No. 81703303); Shanghai Municipal Government Pujiang Research  
6  
7 338 Development Program (Grant No. 17PJC070); HeartRescue Project China Program;  
8  
9 339 and Innovative Research Team of High-level Local Universities in Shanghai.

10  
11 340 **Patient consent for publication:** Not applicable.

12  
13  
14 341 **Provenance and peer review:** Not commissioned; externally peer reviewed.  
15  
16  
17  
18  
19  
20  
21  
22  
23  
24  
25  
26  
27  
28  
29  
30  
31  
32  
33  
34  
35  
36  
37  
38  
39  
40  
41  
42  
43  
44  
45  
46  
47  
48  
49  
50  
51  
52  
53  
54  
55  
56  
57  
58  
59  
60

For peer review only

## 342 REFERENCES

- 343 1. Kern KB, Hilwig RW, Berg RA, et al. Importance of continuous chest compressions during  
344 cardiopulmonary resuscitation: improved outcome during a simulated single lay-rescuer  
345 scenario. *Circulation* 2002;105(5):645-9. doi: 10.1161/hc0502.102963 [published Online  
346 First: 2002/02/06]
- 347 2. Steen S, Liao Q, Pierre L, et al. The critical importance of minimal delay between chest  
348 compressions and subsequent defibrillation: a haemodynamic explanation. *Resuscitation*  
349 2003;58(3):249-58. doi: 10.1016/s0300-9572(03)00265-x [published Online First:  
350 2003/09/13]
- 351 3. Meaney PA, Bobrow BJ, Mancini ME, et al. Cardiopulmonary resuscitation quality:  
352 [corrected] improving cardiac resuscitation outcomes both inside and outside the hospital:  
353 a consensus statement from the American Heart Association. *Circulation* 2013;128(4):417-  
354 35. doi: 10.1161/CIR.0b013e31829d8654 [published Online First: 2013/06/25]
- 355 4. Panchal AR, Berg KM, Cabanas JG, et al. 2019 American Heart Association Focused Update  
356 on Systems of Care: Dispatcher-Assisted Cardiopulmonary Resuscitation and Cardiac  
357 Arrest Centers: An Update to the American Heart Association Guidelines for  
358 Cardiopulmonary Resuscitation and Emergency Cardiovascular Care. *Circulation*  
359 2019;140(24):e895-e903. doi: 10.1161/cir.0000000000000733 [published Online First:  
360 2019/11/15]
- 361 5. Perkins GD, Handley AJ, Koster RW, et al. European Resuscitation Council Guidelines for  
362 Resuscitation 2015: Section 2. Adult basic life support and automated external defibrillation.  
363 *Resuscitation* 2015;95:81-99. doi: <https://doi.org/10.1016/j.resuscitation.2015.07.015>  
364 [published Online First: 2015/10/15]
- 365 6. Semeraro F, Taggi F, Tammaro G, et al. iCPR: a new application of high-quality  
366 cardiopulmonary resuscitation training. *Resuscitation* 2011;82(4):436-41. doi:  
367 10.1016/j.resuscitation.2010.11.023 [published Online First: 2011/01/14]
- 368 7. Zapletal B, Greif R, Stumpf D, et al. Comparing three CPR feedback devices and standard  
369 BLS in a single rescuer scenario: a randomised simulation study. *Resuscitation*  
370 2014;85(4):560-6. doi: 10.1016/j.resuscitation.2013.10.028 [published Online First:  
371 2013/11/13]
- 372 8. Sakai T, Kitamura T, Nishiyama C, et al. Cardiopulmonary resuscitation support application  
373 on a smartphone - randomized controlled trial. *Circ J* 2015;79(5):1052-7. doi:  
374 10.1253/circj.CJ-14-1258 [published Online First: 2015/03/06]
- 375 9. Plata C, Stolz M, Warnecke T, et al. Using a smartphone application (PocketCPR) to  
376 determine CPR quality in a bystander CPR scenario - A manikin trial. *Resuscitation*  
377 2019;137:87-93. doi: 10.1016/j.resuscitation.2019.01.039 [published Online First:  
378 2019/02/19]
- 379 10. Paal P, Pircher I, Baur T, et al. Mobile phone-assisted basic life support augmented with a  
380 metronome. *The Journal of emergency medicine* 2012;43(3):472-7. doi:  
381 10.1016/j.jemermed.2011.09.011 [published Online First: 2012/01/20]
- 382 11. Eaton G, Renshaw J, Gregory P, et al. Can the British Heart Foundation PocketCPR  
383 application improve the performance of chest compressions during bystander resuscitation:  
384 A randomised crossover manikin study. *Health Informatics J* 2018;24(1):14-23. doi:  
385 10.1177/1460458216652645 [published Online First: 2016/07/13]
- 386 12. Kovic I, Lulic I, Lulic D. A new method of investigating the ergonomics of visual  
387 cardiopulmonary resuscitation (CPR) feedback delivery. *Resuscitation* 2012;83(9):e191-2.  
388 doi: 10.1016/j.resuscitation.2012.05.023 [published Online First: 2012/06/12]
- 389 13. Perkins GD, Handley AJ, Koster RW, et al. European Resuscitation Council Guidelines for  
390 Resuscitation 2015: Section 2. Adult basic life support and automated external defibrillation.  
391 *Resuscitation* 2015;95:81-99. doi: 10.1016/j.resuscitation.2015.07.015 [published Online  
392 First: 2015/10/20]

- 1  
2  
3 393 14. Kleinman ME, Goldberger ZD, Rea T, et al. 2017 American Heart Association Focused  
4 394 Update on Adult Basic Life Support and Cardiopulmonary Resuscitation Quality: An  
5 395 Update to the American Heart Association Guidelines for Cardiopulmonary Resuscitation  
6 396 and Emergency Cardiovascular Care. *Circulation* 2018;137(1):e7-e13. doi:  
7 397 10.1161/cir.0000000000000539 [published Online First: 2017/11/09]  
8 398 15. Meinich-Bache Ø, Engan K, Birkenes TS, et al. Real-Time Chest Compression Quality  
9 399 Measurements by Smartphone Camera. *J Healthc Eng* 2018;2018:6241856-56. doi:  
10 400 10.1155/2018/6241856  
11 401 16. The WeCan CPR Training Program in China  
12 402 [https://www.globalresuscitationalliance.org/wp-](https://www.globalresuscitationalliance.org/wp-content/uploads/2019/12/China_Community_Training.pdf)  
13 403 [content/uploads/2019/12/China\\_Community\\_Training.pdf](https://www.globalresuscitationalliance.org/wp-content/uploads/2019/12/China_Community_Training.pdf)2019 [accessed 01/05 2020].  
14 404 17. Meinich-Bache O, Engan K, Birkenes TS, et al. Real-Time Chest Compression Quality  
15 405 Measurements by Smartphone Camera. *Journal of healthcare engineering*  
16 406 2018;2018:6241856. doi: 10.1155/2018/6241856 [published Online First: 2018/12/26]  
17 407 18. Medical Priority Dispatch System (version 12.1.3) Salt Lake City, Utah, USA2008  
18 408 19. Monsieurs KG, Nolan JP, Bossaert LL, et al. European Resuscitation Council Guidelines  
19 409 for Resuscitation 2015: Section 1. Executive summary. *Resuscitation* 2015;95:1-80. doi:  
20 410 10.1016/j.resuscitation.2015.07.038 [published Online First: 2015/10/20]  
21 411 20. Neumar RW, Shuster M, Callaway CW, et al. Part 1: Executive Summary: 2015 American  
22 412 Heart Association Guidelines Update for Cardiopulmonary Resuscitation and Emergency  
23 413 Cardiovascular Care. *Circulation* 2015;132(18 Suppl 2):S315-67. doi:  
24 414 10.1161/cir.0000000000000252 [published Online First: 2015/10/17]  
25 415 21. Birkenes TS, Myklebust H, Neset A, et al. Quality of CPR performed by trained bystanders  
26 416 with optimized pre-arrival instructions. *Resuscitation* 2014;85(1):124-30. doi:  
27 417 10.1016/j.resuscitation.2013.09.015 [published Online First: 2013/10/2]  
28 418 22. Lin Y-Y, Chiang W-C, Hsieh M-J, et al. Quality of audio-assisted versus video-assisted  
29 419 dispatcher-instructed bystander cardiopulmonary resuscitation: A systematic review and  
30 420 meta-analysis. *Resuscitation* 2018;123:77-85. doi: 10.1016/j.resuscitation.2017.12.010  
31 421 [published Online First: 2017/12/12]  
32 422 23. Lee JS, Jeon WC, Ahn JH, et al. The effect of a cellular-phone video demonstration to  
33 423 improve the quality of dispatcher-assisted chest compression-only cardiopulmonary  
34 424 resuscitation as compared with audio coaching. *Resuscitation* 2011;82:64-8. doi:  
35 425 10.1016/j.resuscitation.2010.09.467 [published Online First: 2010/10/30]  
36 426 24. Stipulante S, Delfosse AS, Donneau AF, et al. Inter-active videoconferencing versus audio  
37 427 telephone calls for dispatcher-assisted cardiopulmonary resuscitation using the ALERT  
38 428 algorithm: a randomized trial. *Eur J Emerg Med* 2016;23:418-24. doi:  
39 429 10.1097/MEJ.0000000000000338.  
40 430 25. Bolle SR, Scholl J, Gilbert M. Can video mobile phones improve CPR quality when used  
41 431 for dispatcher assistance during simulated cardiac arrest. *Acta Anaesthesiol Scand*  
42 432 2009;53:116-20. doi: 10.1111/j.1399-6576.2008.01779.x [published Online First:  
43 433 2008/10/22]  
44 434 26. Johnsen E, Bolle SR. To see or not to see—better dispatcher-assisted CPR with video-calls?  
45 435 A qualitative study based on simulated trials. *Resuscitation* 2008;78:320-6. doi:  
46 436 10.1016/j.resuscitation.2008.04.024 [published Online First: 2008/06/25]  
47 437 27. Lee SY, Song KJ, Shin SD, et al. Comparison of the effects of audio-instructed and video-  
48 438 instructed dispatcher-assisted cardiopulmonary resuscitation on resuscitation outcomes after  
49 439 out-of-hospital cardiac arrest. *Resuscitation* 2020;147:12-20. doi:  
50 440 10.1016/j.resuscitation.2019.12.004 [published Online First: 2019/12/13]  
51  
52 441 28. Kovic I, Lulic I. Mobile phone in the chain of survival. *Resuscitation* 2011;82(6):776-9.  
53 442 doi: 10.1016/j.resuscitation.2011.02.014 [published Online First: 2011/04/08]  
54  
55  
56  
57  
58  
59  
60

- 1  
2  
3 443 29. Paal P, Pircher I, Baur T, et al. Mobile phone-assisted basic life support augmented with a  
4 444 metronome. *The Journal of emergency medicine* 2012;43:472-7. doi:  
5 445 10.1016/j.jemermed.2011.09.011 [published Online First: 2012/01/17]  
6  
7 446 30. Sasson C, Rogers MAM, Dahl J, et al. Predictors of Survival From Out-of-Hospital Cardiac  
8 447 Arrest. *Circulation: Cardiovascular Quality and Outcomes* 2010;3(1):63-81. doi:  
9 448 10.1161/circoutcomes.109.889576 [published Online First: 2009/11/10]  
10 449 31. Wissenberg M, Lippert FK, Folke F, et al. Association of National Initiatives to Improve  
11 450 Cardiac Arrest Management With Rates of Bystander Intervention and Patient Survival  
12 451 After Out-of-Hospital Cardiac Arrest. *JAMA* 2013;310(13):1377-84. doi:  
13 452 10.1001/jama.2013.278483  
14 453 32. Johnsen E, Bolle SR. To see or not to see--better dispatcher-assisted CPR with video-calls?  
15 454 A qualitative study based on simulated trials. *Resuscitation* 2008;78(3):320-6. doi:  
16 455 10.1016/j.resuscitation.2008.04.024 [published Online First: 2008/06/25]  
17  
18 456  
19  
20  
21  
22  
23  
24  
25  
26  
27  
28  
29  
30  
31  
32  
33  
34  
35  
36  
37  
38  
39  
40  
41  
42  
43  
44  
45  
46  
47  
48  
49  
50  
51  
52  
53  
54  
55  
56  
57  
58  
59  
60

**Table 1.** Demographic characteristics of the participants

|                                     | <b>Total<br/>(N=186)</b> | <b>TCPRLink group<br/>(n=94)</b> | <b>T-CPR group<br/>(n=92)</b> |
|-------------------------------------|--------------------------|----------------------------------|-------------------------------|
| Male (n, %)                         | 83 (44.6)                | 42 (44.7)                        | 41 (44.6)                     |
| Age, years                          |                          |                                  |                               |
| 18–24                               | 54 (27.0)                | 29 (30.9)                        | 25 (27.2)                     |
| 25–54                               | 75 (37.5)                | 37 (39.4)                        | 38 (41.3)                     |
| 55–65                               | 57 (28.5)                | 28 (29.8)                        | 29 (31.5)                     |
| Education status (n, %)             |                          |                                  |                               |
| ≤High school/junior college         | 68 (36.6)                | 30 (31.9)                        | 38 (41.3)                     |
| College                             | 75 (40.3)                | 44 (46.8)                        | 31 (33.7)                     |
| Masters and PhD                     | 43 (23.1)                | 20 (21.3)                        | 23 (25.0)                     |
| Height, m, means ± SD               | 1.68 ± 0.1               | 1.67 ± 0.1                       | 1.68 ± 0.1                    |
| Weight, kg, means ± SD              | 64.5 ± 11.4              | 63.3 ± 10.3                      | 65.6 ± 12.4                   |
| BMI, kg/m <sup>2</sup> , means ± SD | 22.9 ± 3.1               | 22.7 ± 2.8                       | 23.0 ± 3.4                    |

**Table 2.** Participants' CPR performance assessment in the T-CPR simulation scenario

| T-CPR performance                                                      | Phase I (N=186)          |                       |                     | Phase II (N=170)            |                       |                 |
|------------------------------------------------------------------------|--------------------------|-----------------------|---------------------|-----------------------------|-----------------------|-----------------|
|                                                                        | TCPRLink group<br>(n=94) | T-CPR group<br>(n=92) | <i>P</i> -<br>value | TCPRLink<br>group<br>(n=86) | T-CPR group<br>(n=84) | <i>P</i> -value |
| <b>Counting with the dispatcher (n, %)</b>                             | 20 (21.3)                | 38 (41.3)             | 0.003               | 6 (7.0)                     | 19 (22.6)             | 0.004           |
| <b>Time from call connected to: (seconds, mean ± SD)</b>               |                          |                       |                     |                             |                       |                 |
| Cardiac arrest identification                                          | 98.2 ± 12.8              | 99.1 ± 16.9           | 0.68                | 101.7 ± 13.0                | 104.2 ± 15.0          | 0.25            |
| First chest compression                                                | 143.6 ± 17.8             | 140.0 ± 25.8          | 0.27                | 149.7 ± 16.6                | 146.0 ± 20.2          | 0.19            |
| <b>CPR parameters [M (P<sub>25</sub>-P<sub>75</sub>) or mean ± SD]</b> |                          |                       |                     |                             |                       |                 |
| Total number of compressions                                           | 661 (643–674)            | 648 (615–674)         | 0.035               | 661 (644–675)               | 646 (630–667)         | 0.002           |
| Average compression rate (min <sup>-1</sup> )                          | 111 (109–113)            | 108 (103–112)         | 0.002               | 111 (109–113)               | 108 (105–112)         | <0.001          |
| Percentage of adequate rate (100–120 min <sup>-1</sup> , %)            | 96 (89–98)               | 82 (50–97)            | <0.001              | 95 (78–98)                  | 93 (67–97)            | 0.11            |
| Average compression depth (mm)                                         | 45.4 ± 8.8               | 43.6 ± 8.8            | 0.17                | 43.9 ± 9.1                  | 42.9 ± 11.5           | 0.59            |
| Percentage of adequate depth (50–60 mm, %)                             | 20 (3–74)                | 12 (0–51)             | 0.14                | 17 (4–54)                   | 13 (0–57)             | 0.26            |
| Percentage of fully released (%)                                       | 97 (72–100)              | 97 (69–100)           | 0.79                | 95 (54–100)                 | 96 (51–100)           | 0.40            |
| Average hands-off time (s)                                             | 0 (0–1)                  | 0 (0–1)               | 0.24                | 0 (0–1)                     | 0 (0–1)               | 0.72            |

Phase I tests were cardiopulmonary resuscitation (CPR) performance and capabilities assessment using the telephone-assisted CPR (T-CPR) simulation scenario among individuals who have undergone CPR training with/without the TCPRLink application.

Phase II tests were CPR skill retention assessments among individuals with/without TCPRLink application after 3 months.



**Table 3** Age-stratified comparison of the participants' CPR performance in the TCPRLink and T-CPR groups (Phase I)

| TCPR performance                                                       | Age 18–24 years       |                    |         | Age 25–54 years       |                    |         | Age 55–65 years       |                    |         |
|------------------------------------------------------------------------|-----------------------|--------------------|---------|-----------------------|--------------------|---------|-----------------------|--------------------|---------|
|                                                                        | TCPRLink group (n=29) | T-CPR group (n=25) | P-value | TCPRLink group (n=37) | T-CPR group (n=38) | P-value | TCPRLink group (n=28) | T-CPR group (n=29) | P-value |
| <b>Counting with the dispatcher (n, %)</b>                             | 9 (31.0)              | 12 (48.0)          | 0.20    | 7 (18.9)              | 19 (50.0)          | 0.005   | 4 (14.3)              | 7 (4.1)            | 0.35    |
| <b>Time from call connection to: (seconds, mean ± SD)</b>              |                       |                    |         |                       |                    |         |                       |                    |         |
| Cardiac arrest identification                                          | 98.9 ± 13.5           | 96.4 ± 19.5        | 0.58    | 97.0 ± 13.2           | 98.2 ± 14.0        | 0.72    | 98.9 ± 12.0           | 102.7 ± 17.8       | 0.36    |
| First chest compression                                                | 141.4 ± 20.2          | 137.8 ± 26.8       | 0.57    | 143.6 ± 17.7          | 135.9 ± 26.9       | 0.14    | 145.8 ± 15.4          | 147.1 ± 22.5       | 0.79    |
| <b>CPR parameters [M (P<sub>25</sub>-P<sub>75</sub>) or mean ± SD]</b> |                       |                    |         |                       |                    |         |                       |                    |         |
| Total number of compression                                            | 663 (640–671)         | 650 (608–666)      | 0.21    | 659 (653–677)         | 652 (632–674)      | 0.29    | 659 (640–676)         | 640 (612–672)      | 0.14    |
| Average compression rate, (min <sup>-1</sup> )                         | 111 (108–113)         | 108 (101–112)      | 0.03    | 111 (109–114)         | 109 (106–113)      | 0.12    | 110 (107–113)         | 107 (103–113)      | 0.06    |
| Percentage of adequate rate, (100–120 min <sup>-1</sup> , %)           | 95 (88–99)            | 82 (50–96)         | 0.01    | 97 (90–98)            | 89 (51–97)         | 0.006   | 95 (88–97)            | 71 (48–95)         | 0.003   |
| Average compression depth (mm)                                         | 41.8 ± 7.8            | 43.1 ± 6.6         | 0.49    | 46.9 ± 8.2            | 47.8 ± 8.1         | 0.67    | 47.1 ± 9.6            | 38.5 ± 8.7         | 0.001   |
| Percentage of adequate depth (50–60 mm, %)                             | 8 (0–28)              | 12 (4–33)          | 0.37    | 25 (9–84)             | 37 (7–86)          | 0.92    | 45 (1–99)             | 1 (0–14)           | 0.002   |
| Percentage of fully released (%)                                       | 100 (95–100)          | 100 (96–100)       | 0.66    | 98 (79–100)           | 95 (57–99)         | 0.24    | 71 (5–100)            | 96 (37–100)        | 0.13    |
| Average hands-off time (s)                                             | 0 (0–2)               | 0 (0–1)            | 0.24    | 0 (0–1)               | 0 (0–0)            | 0.45    | 0 (0–1)               | 0 (0–1)            | 0.92    |

Phase I tests were conducted for the evaluation of CPR performance and capabilities assessment using a telephone-assisted CPR (T-CPR) simulation scenario among individuals who have undergone CPR training with/without the TCPRLink application.



**Table 4** Age-stratified comparison of the participants' CPR performance between the TCPRLink and T-CPR groups (Phase II)

| TCPR performance                                                      | Age 18–24 years       |                    |                 | Age 25–54 years       |                    |                 | Age 55–65 years       |                    |                 |
|-----------------------------------------------------------------------|-----------------------|--------------------|-----------------|-----------------------|--------------------|-----------------|-----------------------|--------------------|-----------------|
|                                                                       | TCPRLink group (n=29) | T-CPR group (n=23) | <i>P</i> -value | TCPRLink group (n=31) | T-CPR group (n=34) | <i>P</i> -value | TCPRLink group (n=26) | T-CPR group (n=27) | <i>P</i> -value |
| <b>Counting with the dispatcher (n, %)</b>                            | 2 (6.9)               | 4 (17.4)           | 0.40            | 4 (12.9)              | 12 (35.3)          | 0.036           | 0 (0)                 | 3 (11.1)           | 0.24            |
| <b>Time from call connected to: (seconds, mean ± SD)</b>              |                       |                    |                 |                       |                    |                 |                       |                    |                 |
| Cardiac arrest identification                                         | 99.8 ± 16.0           | 100.4 ± 16.3       | 0.89            | 103.8 ± 13.6          | 103.0 ± 11.9       | 0.82            | 101.4 ± 7.3           | 108.9 ± 16.7       | 0.04            |
| First chest compression                                               | 148.4 ± 20.1          | 144.2 ± 25.5       | 0.52            | 153.2 ± 17.3          | 143.6 ± 13.9       | 0.018           | 146.8 ± 9.8           | 150.4 ± 21.9       | 0.45            |
| <b>CPR parameters [M(P<sub>25</sub>-P<sub>75</sub>) or mean ± SD]</b> |                       |                    |                 |                       |                    |                 |                       |                    |                 |
| Total number of compressions                                          | 658 (643–678)         | 639 (605–653)      | 0.004           | 665 (653–675)         | 648 (640–668)      | 0.09            | 663 (644–676)         | 643 (627–680)      | 0.32            |
| Average compression rate (min <sup>-1</sup> )                         | 111 (109–113)         | 107 (101–110)      | <0.001          | 112 (109–113)         | 109 (107–112)      | 0.06            | 111 (107–114)         | 109 (105–114)      | 0.28            |
| Percentage of adequate rate (100-120 min <sup>-1</sup> , %)           | 96 (82–99)            | 82 (60–98)         | 0.08            | 95 (78–98)            | 95 (84–97)         | 0.64            | 92 (77–98)            | 90 (70–97)         | 0.61            |
| Average compression depth (mm)                                        | 41.7 ± 8.2            | 43.7 ± 14.1        | 0.55            | 45.2 ± 9.0            | 45.4 ± 9.6         | 0.92            | 44.7 ± 10.1           | 39.3 ± 10.8        | 0.07            |
| Percentage of adequate depth (50–60 mm, %)                            | 10 (2–32)             | 10 (0–54)          | 0.92            | 19 (7–55)             | 22 (2–81)          | 0.97            | 19 (3–68)             | 2 (0–24)           | 0.04            |
| Percentage of fully released compressions (%)                         | 100 (92–100)          | 99 (91–100)        | 0.52            | 93 (15–100)           | 90 (44–99)         | 0.65            | 68 (33–100)           | 89 (24–99)         | 0.84            |
| Average hands-off time (s)                                            | 0 (0–2)               | 0 (0–1)            | 0.16            | 0 (0–1)               | 0 (0–1)            | 0.48            | 0 (0–0)               | 0 (0–0)            | 0.89            |

Phase II tests were conducted for the evaluation of CPR performance and capabilities assessment using telephone-assisted CPR (T-CPR) simulation scenario among individuals who have received CPR training with/without a TCPRLink application at 3 months after the training.

## Figure Legends

**Figure 1** The illustration of TCPRLink application in use.

(a) Illustration photo of TCPRLink in use in a simulated T-CPR situation. (b) Screenshots of TCPRLink. Front page to the left and bystander feedback example to the right. (c) Screenshot of the web server available for the dispatcher.

**Figure 2** Flow diagram of the participants.

**Figure 3** Distribution of the chest compression rate and the proportion of the adequate chest compression rate (100-120 min<sup>-1</sup>) in TCPRLink group and T-CPR group.

Phase I test was conducted in T-CPR trained individuals with/without TCPRLink App after inclusion.

Phase II test was conducted in the same individuals with/without TCPRLink App after three months.

**Figure 4** Counting with dispatcher in TCPRLink group and T-CPR group.

Phase I test was conducted in T-CPR trained individuals with/without TCPRLink App after inclusion.

Phase II test was conducted in the same individuals with/without TCPRLink App after three months.

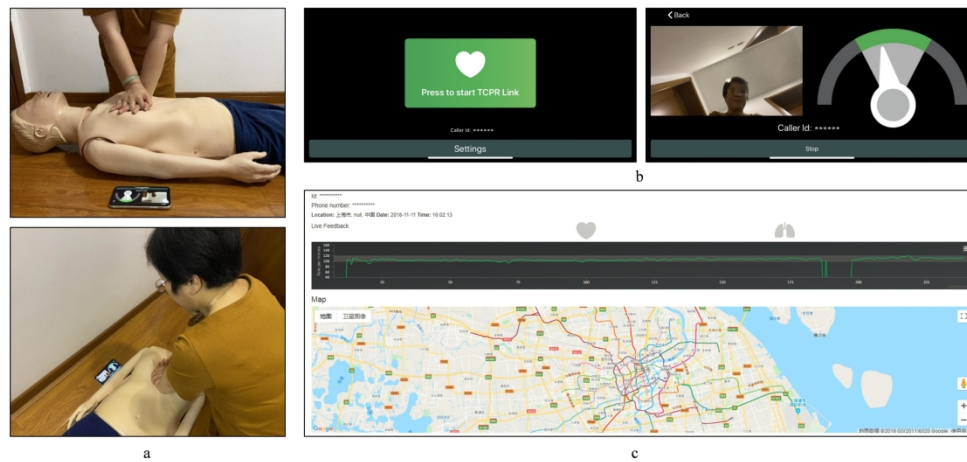

Figure 1 The illustration of TCPRLink application in use.  
(a) Illustration photo of TCPRLink in use in a simulated T-CPR situation. (b) Screenshots of TCPRLink. Front page to the left and bystander feedback example to the right. (c) Screenshot of the web server available for the dispatcher.

225x111mm (300 x 300 DPI)

1  
2  
3  
4  
5  
6  
7  
8  
9  
10  
11  
12  
13  
14  
15  
16  
17  
18  
19  
20  
21  
22  
23  
24  
25  
26  
27  
28  
29  
30  
31  
32  
33  
34  
35  
36  
37  
38  
39  
40  
41  
42  
43  
44  
45  
46  
47  
48  
49  
50  
51  
52  
53  
54  
55  
56  
57  
58  
59  
60

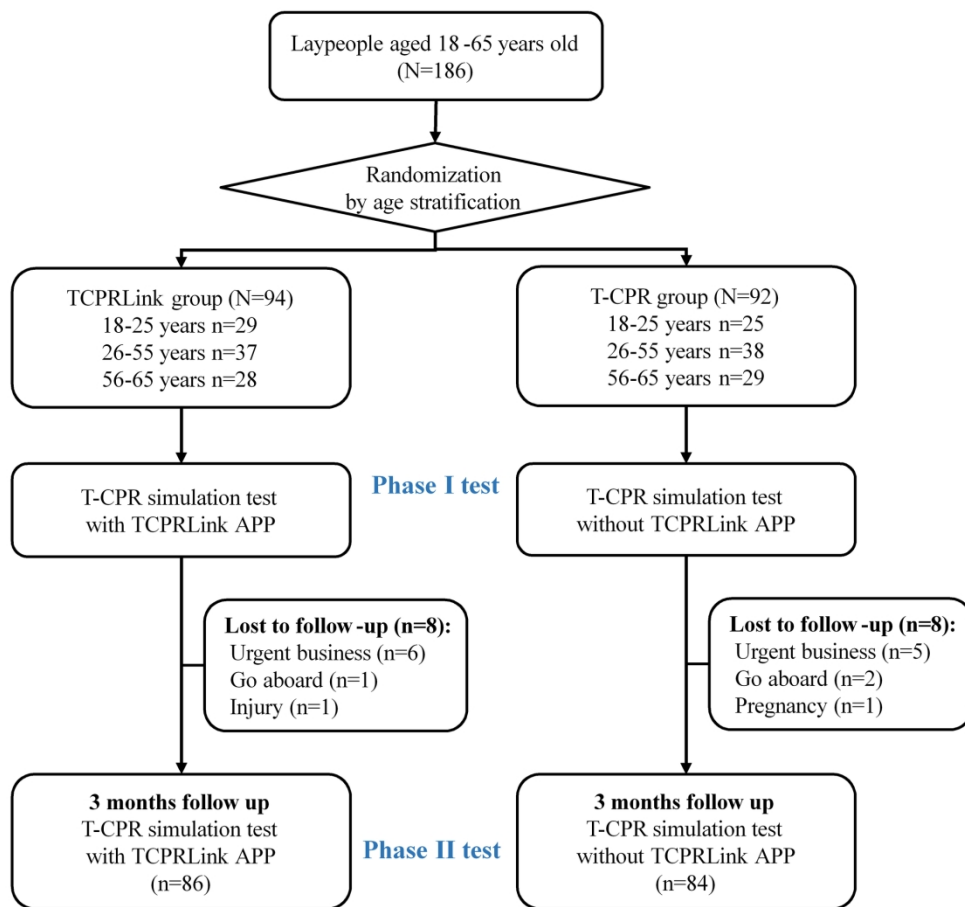

Figure 2 Flow diagram of the participants.

187x175mm (300 x 300 DPI)

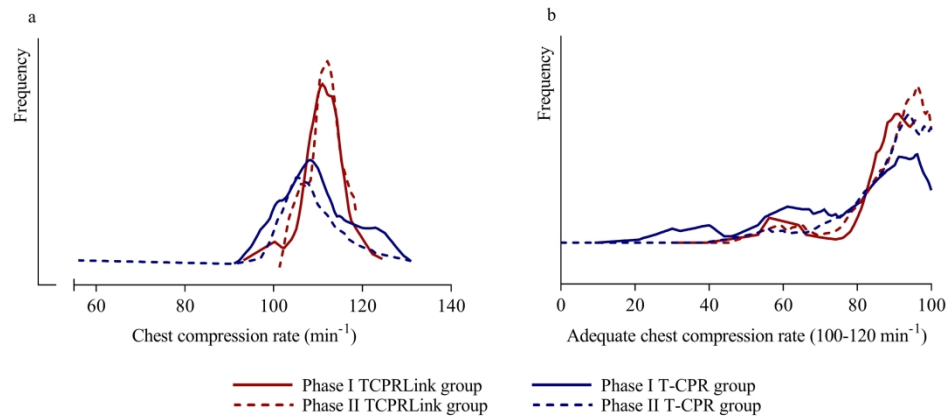

Figure 3 Distribution of the chest compression rate and the proportion of the adequate chest compression rate (100-120 min<sup>-1</sup>) in TCPRLink group and T-CPR group.

Phase I test was conducted in T-CPR trained individuals with/without TCPRLink App after inclusion. Phase II test was conducted in the same individuals with/without TCPRLink App after three months.

269x117mm (300 x 300 DPI)

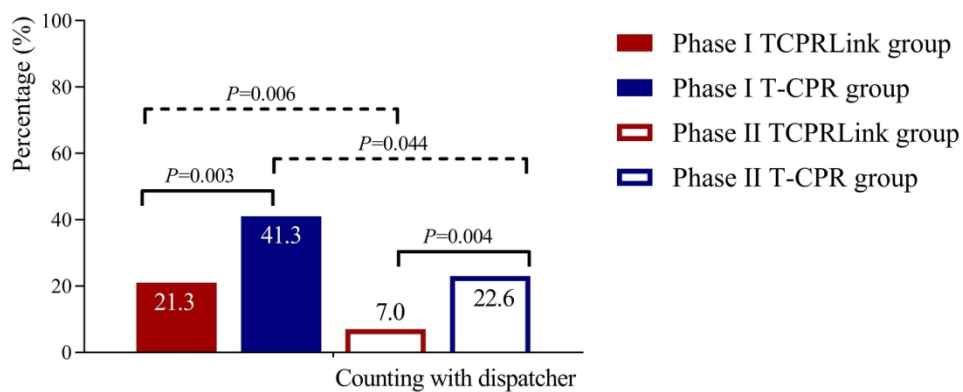

Figure 4 Counting with dispatcher in TCPRLink group and T-CPR group. Phase I test was conducted in T-CPR trained individuals with/without TCPRLink App after inclusion. Phase II test was conducted in the same individuals with/without TCPRLink App after three months.

152x66mm (300 x 300 DPI)

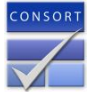

## CONSORT 2010 checklist of information to include when reporting a randomised trial\*

| Section/Topic                    | Item No | Checklist item                                                                                                                                                                              | Reported on page No |
|----------------------------------|---------|---------------------------------------------------------------------------------------------------------------------------------------------------------------------------------------------|---------------------|
| <b>Title and abstract</b>        |         |                                                                                                                                                                                             |                     |
|                                  | 1a      | Identification as a randomised trial in the title                                                                                                                                           | 1                   |
|                                  | 1b      | Structured summary of trial design, methods, results, and conclusions (for specific guidance see CONSORT for abstracts)                                                                     | 2                   |
| <b>Introduction</b>              |         |                                                                                                                                                                                             |                     |
| Background and objectives        | 2a      | Scientific background and explanation of rationale                                                                                                                                          | 4                   |
|                                  | 2b      | Specific objectives or hypotheses                                                                                                                                                           | 4                   |
| <b>Methods</b>                   |         |                                                                                                                                                                                             |                     |
| Trial design                     | 3a      | Description of trial design (such as parallel, factorial) including allocation ratio                                                                                                        | 5                   |
|                                  | 3b      | Important changes to methods after trial commencement (such as eligibility criteria), with reasons                                                                                          | \                   |
| Participants                     | 4a      | Eligibility criteria for participants                                                                                                                                                       | 5                   |
|                                  | 4b      | Settings and locations where the data were collected                                                                                                                                        | 5                   |
| Interventions                    | 5       | The interventions for each group with sufficient details to allow replication, including how and when they were actually administered                                                       | 5, 6                |
| Outcomes                         | 6a      | Completely defined pre-specified primary and secondary outcome measures, including how and when they were assessed                                                                          | 7                   |
|                                  | 6b      | Any changes to trial outcomes after the trial commenced, with reasons                                                                                                                       | \                   |
| Sample size                      | 7a      | How sample size was determined                                                                                                                                                              | 7, 8                |
|                                  | 7b      | When applicable, explanation of any interim analyses and stopping guidelines                                                                                                                | \                   |
| <b>Randomisation:</b>            |         |                                                                                                                                                                                             |                     |
| Sequence generation              | 8a      | Method used to generate the random allocation sequence                                                                                                                                      | 5                   |
|                                  | 8b      | Type of randomisation; details of any restriction (such as blocking and block size)                                                                                                         | 5                   |
| Allocation concealment mechanism | 9       | Mechanism used to implement the random allocation sequence (such as sequentially numbered containers), describing any steps taken to conceal the sequence until interventions were assigned | \                   |
| Implementation                   | 10      | Who generated the random allocation sequence, who enrolled participants, and who assigned participants to interventions                                                                     | 5                   |
| Blinding                         | 11a     | If done, who was blinded after assignment to interventions (for example, participants, care providers, those                                                                                | \                   |

|                                                      |     |                                                                                                                                                   |             |
|------------------------------------------------------|-----|---------------------------------------------------------------------------------------------------------------------------------------------------|-------------|
|                                                      |     | assessing outcomes) and how                                                                                                                       |             |
|                                                      | 11b | If relevant, description of the similarity of interventions                                                                                       | \           |
| Statistical methods                                  | 12a | Statistical methods used to compare groups for primary and secondary outcomes                                                                     | 8           |
|                                                      | 12b | Methods for additional analyses, such as subgroup analyses and adjusted analyses                                                                  | 8           |
| <b>Results</b>                                       |     |                                                                                                                                                   |             |
| Participant flow (a diagram is strongly recommended) | 13a | For each group, the numbers of participants who were randomly assigned, received intended treatment, and were analysed for the primary outcome    | 8, Figure 2 |
|                                                      | 13b | For each group, losses and exclusions after randomisation, together with reasons                                                                  | Figure 2    |
| Recruitment                                          | 14a | Dates defining the periods of recruitment and follow-up                                                                                           | 5           |
|                                                      | 14b | Why the trial ended or was stopped                                                                                                                | \           |
| Baseline data                                        | 15  | A table showing baseline demographic and clinical characteristics for each group                                                                  | Table 1     |
| Numbers analysed                                     | 16  | For each group, number of participants (denominator) included in each analysis and whether the analysis was by original assigned groups           | Figure 2    |
| Outcomes and estimation                              | 17a | For each primary and secondary outcome, results for each group, and the estimated effect size and its precision (such as 95% confidence interval) | Table 2     |
|                                                      | 17b | For binary outcomes, presentation of both absolute and relative effect sizes is recommended                                                       | \           |
| Ancillary analyses                                   | 18  | Results of any other analyses performed, including subgroup analyses and adjusted analyses, distinguishing pre-specified from exploratory         | Table 3-4   |
| Harms                                                | 19  | All important harms or unintended effects in each group (for specific guidance see CONSORT for harms)                                             | \           |
| <b>Discussion</b>                                    |     |                                                                                                                                                   |             |
| Limitations                                          | 20  | Trial limitations, addressing sources of potential bias, imprecision, and, if relevant, multiplicity of analyses                                  | 11          |
| Generalisability                                     | 21  | Generalisability (external validity, applicability) of the trial findings                                                                         | 9-11        |
| Interpretation                                       | 22  | Interpretation consistent with results, balancing benefits and harms, and considering other relevant evidence                                     | 9-11        |
| <b>Other information</b>                             |     |                                                                                                                                                   |             |
| Registration                                         | 23  | Registration number and name of trial registry                                                                                                    | \           |
| Protocol                                             | 24  | Where the full trial protocol can be accessed, if available                                                                                       | \           |
| Funding                                              | 25  | Sources of funding and other support (such as supply of drugs), role of funders                                                                   | 1, 12       |

\*We strongly recommend reading this statement in conjunction with the CONSORT 2010 Explanation and Elaboration for important clarifications on all the items. If relevant, we also recommend reading CONSORT extensions for cluster randomised trials, non-inferiority and equivalence trials, non-pharmacological treatments, herbal interventions, and pragmatic trials. Additional extensions are forthcoming: for those and for up to date references relevant to this checklist, see [www.consort-statement.org](http://www.consort-statement.org).



# BMJ Open

## Effect of a Real-Time Feedback Smartphone Application (TCPRLink) on the Quality of Telephone-assisted CPR Performed by trained laypeople in China: A manikin-based randomized controlled study

|                                 |                                                                                                                                                                                                                                                                                                                             |
|---------------------------------|-----------------------------------------------------------------------------------------------------------------------------------------------------------------------------------------------------------------------------------------------------------------------------------------------------------------------------|
| Journal:                        | <i>BMJ Open</i>                                                                                                                                                                                                                                                                                                             |
| Manuscript ID                   | bmjopen-2020-038813.R2                                                                                                                                                                                                                                                                                                      |
| Article Type:                   | Original research                                                                                                                                                                                                                                                                                                           |
| Date Submitted by the Author:   | 11-Sep-2020                                                                                                                                                                                                                                                                                                                 |
| Complete List of Authors:       | Dong, Xuejie; Shanghai Jiao Tong University School of Public Health, Zhang, Lin; Shanghai Jiao Tong University School of Public Health, Myklebust, Helge; Laerdal Medical Cooperation Birkenes, Tonje; Laerdal Medical Cooperation Zheng, Zhi-Jie ; Peking University, Department of Global Health, School of Public Health |
| <b>Primary Subject Heading</b>: | Emergency medicine                                                                                                                                                                                                                                                                                                          |
| Secondary Subject Heading:      | Public health                                                                                                                                                                                                                                                                                                               |
| Keywords:                       | ACCIDENT & EMERGENCY MEDICINE, PUBLIC HEALTH, Telemedicine < BIOTECHNOLOGY & BIOINFORMATICS                                                                                                                                                                                                                                 |
|                                 |                                                                                                                                                                                                                                                                                                                             |

SCHOLARONE™  
Manuscripts



I, the Submitting Author has the right to grant and does grant on behalf of all authors of the Work (as defined in the below author licence), an exclusive licence and/or a non-exclusive licence for contributions from authors who are: i) UK Crown employees; ii) where BMJ has agreed a CC-BY licence shall apply, and/or iii) in accordance with the terms applicable for US Federal Government officers or employees acting as part of their official duties; on a worldwide, perpetual, irrevocable, royalty-free basis to BMJ Publishing Group Ltd ("BMJ") its licensees and where the relevant Journal is co-owned by BMJ to the co-owners of the Journal, to publish the Work in this journal and any other BMJ products and to exploit all rights, as set out in our [licence](#).

The Submitting Author accepts and understands that any supply made under these terms is made by BMJ to the Submitting Author unless you are acting as an employee on behalf of your employer or a postgraduate student of an affiliated institution which is paying any applicable article publishing charge ("APC") for Open Access articles. Where the Submitting Author wishes to make the Work available on an Open Access basis (and intends to pay the relevant APC), the terms of reuse of such Open Access shall be governed by a Creative Commons licence – details of these licences and which [Creative Commons](#) licence will apply to this Work are set out in our licence referred to above.

Other than as permitted in any relevant BMJ Author's Self Archiving Policies, I confirm this Work has not been accepted for publication elsewhere, is not being considered for publication elsewhere and does not duplicate material already published. I confirm all authors consent to publication of this Work and authorise the granting of this licence.

1  
2  
3  
4 **1 Effect of a Real-Time Feedback Smartphone Application (TCPRLink) on the**  
5  
6 **2 Quality of Telephone-assisted CPR Performed by trained laypeople in China: A**  
7  
8 **3 manikin-based randomized controlled study**  
9

10 Xuejie Dong<sup>1#</sup>, Lin Zhang<sup>1\*#</sup>, Helge Myklebust<sup>2</sup>, Tonje Soraas Birkenes<sup>2</sup>, Zhi-Jie  
11  
12 Zheng<sup>3</sup>  
13

14  
15 1. Shanghai Jiao Tong University School of Public Health  
16

17 2. Laerdal Medical, Norway  
18

19 3. Peking University School of Public Health  
20

21 9

22  
23 # XJ Dong and L Zhang contributed equally to this article.  
24

25 11

26  
27 \***Correspondence and reprint request to:** Lin Zhang, Ph.D., Assistant Professor of  
28  
29 Epidemiology, Shanghai Jiao Tong University School of Public Health, 227 South  
30  
31 Chongqing Road, Shanghai, 200025, China, e-mail: [zhanglynn@sjtu.edu.cn](mailto:zhanglynn@sjtu.edu.cn).  
32

33 15

34  
35 **16 Word count: 3210**  
36

37  
38 **17 Number of figures: 4**  
39

40  
41 **18 Number of tables: 4**  
42

43  
44 **19**  
45  
46  
47  
48  
49  
50  
51  
52  
53  
54  
55  
56  
57  
58  
59  
60

1  
2  
3 20 **ABSTRACT**  
4

5 21 **Objectives:** To determine the effect of a free smartphone application (TCPRLink) that  
6 22 provides real-time monitoring and audiovisual feedback on chest compressions (CC)  
7 23 on trained layperson telephone-assisted cardiopulmonary resuscitation (T-CPR)  
8 24 performance.

9 25 **Design:** A manikin-based randomized controlled study.

10 26 **Setting:** This study was conducted at a multidisciplinary university and a community  
11 27 center in China.

12 28 **Participants:** One hundred and eighty-six adult participants (age 18-65 years) with T-  
13 29 CPR training experience were randomly assigned to the TCPRLink (n=94) and T-CPR  
14 30 (n=92) groups with age stratification.

15 31 **Interventions:** We compared the participants' performance for 6-minutes of CC in a  
16 32 simulated T-CPR scenario both at the baseline and after 3 months.

17 33 **Primary and secondary outcome measures:** The primary outcomes were the CC rate  
18 34 and proportion of adequate CC rate (100–120 min<sup>-1</sup>). The secondary outcomes included  
19 35 the proportion of participants counting the CC rhythm, time to first CC, CC depth,  
20 36 hands-off time, and CC full-release ratio.

21 37 **Results:** Participants in the TCPRLink feedback group more consistently performed  
22 38 CC with higher rate, both initially and 3 month later [median 111 (IQR 109–113) vs.  
23 39 108 (103–112) min<sup>-1</sup>, *P*=0.002 and 111 (109–113) vs. 108 (105–112) min<sup>-1</sup>, *P*<0.001,  
24 40 respectively], with less need to count the rhythm [21.3% vs. 41.3%, *P*=0.003 and 7%  
25 41 vs. 22.6%, *P*=0.004, respectively] compared with the T-CPR group. There were no  
26 42 significant differences in time to the first CC, hands-off time, or CC full-release ratio.  
27 43 Among 55-65 year group, the CC depth was deeper in the TCPRLink group than in the  
28 44 TCPR group (47.1±9.6 vs 38.5±8.7 mm, *P*=0.001, and 44.7±10.1 vs 39.3±10.8 mm,  
29 45 *P*=0.07, respectively).

30 46 **Conclusions:** The TCPRLink application improved T-CPR quality in trained  
31 47 laypersons to provide more effective CCs and lighten the load of counting out the CC  
32 48 with the dispatcher in a simulated T-CPR scenario. Further investigations are required  
33 49 to confirm this effectiveness in real-life resuscitation attempts.

34 50

35 51

1  
2  
3 **52 Strengths and limitations of this study**  
4  
5

- 6 53 • The effectiveness of a real-time feedback smartphone application (TCPRLink)  
7 was evaluated in a telephone-assisted CPR (T-CPR) simulation among  
8 54 participants from the Chinese general population.  
9  
10 55  
11 56 • Trained adult laypersons (age range 18–65 years) participated in this study to  
12 facilitate the identification of discrepancies in T-CPR performance among  
13 57 different age groups.  
14  
15 58  
16 59 • The study included a 3-month follow-up T-CPR performance test to investigate  
17 the participants' skill retention.  
18 60  
19  
20 61 • The Hawthorn effect could not be excluded in the simulation scenario, with the  
21 possibility of a motivation bias.  
22 62  
23  
24 63  
25  
26  
27  
28  
29  
30  
31  
32  
33  
34  
35  
36  
37  
38  
39  
40  
41  
42  
43  
44  
45  
46  
47  
48  
49  
50  
51  
52  
53  
54  
55  
56  
57  
58  
59  
60

## 64 INTRODUCTION

65 Bystander-provided immediate and adequate cardiopulmonary resuscitation (CPR) can  
66 directly impact patient outcomes following an out-of-hospital cardiac arrest.[1-3] The  
67 updated guidelines of the American Heart Association (AHA) and European  
68 Resuscitation Council (ERC) state that telephone-assisted CPR (T-CPR) has a positive  
69 effect on the entire resuscitation process by getting more callers to start CPR and  
70 through coaching the callers to provide effective CPR.[4, 5] Despite significant  
71 advances in the T-CPR instructions during the resuscitation procedures, here exists a  
72 blind zone between the dispatcher and caller. The dispatcher is voice connected to the  
73 caller via the phone, but is unable to see the patient and evaluate the quality of bystander  
74 CPR. Therefore, new strategies to address this challenge are needed.

75 The ubiquitous presence and utilization of smartphones suggest a novel opportunity to  
76 improve resuscitation care through the measurement of bystander CPR metrics.[6-12]  
77 In a recent statement from the AHA and ERC, the use of digital strategies, such as  
78 mobile devices, were encouraged to provide bystanders with an accelerometer to  
79 measure CPR metrics.[13, 14] In adherence to these guidelines, an audiovisual  
80 smartphone application (TCPRLink) was developed to facilitate high-quality  
81 bystander-provided CPR and assist the dispatcher to evaluate the CPR quality in real  
82 time.[15] The TCPRLink application utilizes the smartphone front camera to detect  
83 chest compressions (CC) and displays the CC rate to the bystanders and simultaneously  
84 sends the real-time CC rate and the time without compressions via the internet to a  
85 monitor that is in front of the dispatcher.

86 This study was conducted to evaluate the effectiveness of the TCPRLink application  
87 with real-time audiovisual feedback in dispatcher-assisted CPR during a cardiac arrest  
88 simulation. We hypothesized that this smartphone-based CC rate feedback application  
89 would improve the quality of CPR in the general population compared to the use of  
90 conventional T-CPR instructions.

## 91 METHODS

### 92 Study design and ethics

1  
2  
3 93 This study was a simulation-based randomized experimental trial that was carried out  
4  
5 94 from September 1, 2018 to May 30, 2019. We obtained ethical approval from the Joint  
6  
7 95 Research Ethics Board of the Shanghai Jiao Tong University Schools of Public Health  
8  
9 96 and Nursing (approval no. SJUPN-201714) for study conduct. All participants were  
10  
11 97 verbally informed about the purpose of the study and provided written informed consent.  
12  
13 98 They were informed that their T-CPR performance would be tested and video-recorded  
14  
15 99 in a simulated scenario after training and, again, 3 months later.

## 100 **Study population**

101 We randomly recruited 186 participants from those who participated in the “WeCan  
102  
103 CPR” training program [16] an initiative of the China Resuscitation Academy. College  
104  
105 students and adult laypersons (age range 18–65 years) who had completed the training  
106  
107 program within one week were eligible for study enrolment. Physicians, nurses,  
108  
109 dispatchers, and other healthcare professionals were excluded from the study.

110 The WeCan CPR course is a video-based, 1-hour training program on applying  
111  
112 dispatcher-telephone-guided CPR training in combination with practical and basic CPR  
113  
114 training that is targeted at potential bystanders. Participants learn how to call the  
115  
116 emergency dispatch center, follow the procedure of the T-CPR instructions, and  
117  
118 perform hands-only CPR. All trainees performed at least 550 CC on instrumented  
119  
120 feedback manikins (QCPR Classroom, Laerdal Medical, Norway) during the training.

## 112 **Patient and public involvement**

113 Patients or the public were not involved in the design, or conduct, or reporting, or  
114  
115 dissemination of our research.

## 115 **Randomization**

116 Randomization was stratified by age groups (18–24, 25–54, and 55–65 years) and  
117  
118 conducted to ensure equal distribution of participants across study arms. Participants  
119  
120 were randomized into either the control arm (conventional T-CPR group) or  
121  
122 interventional arm (T-CPR with the TCPRLink group). All participants were informed  
123  
124 the purpose of the study, which was to assess the impact of the TCPRLink App on  
125  
126 resuscitation performance, and were not blinded to the study-arm allocation due to the  
127  
128 nature of the intervention.

### 123 **TCPRLink application**

124 TCPRLink (University of Stavanger and Laerdal Medical, Norway) is a free, CPR  
125 audiovisual feedback smartphone application that was designed to measure the CC rate  
126 and hands-off time and to provide feedback to the *bystander* and the *dispatcher*. The  
127 accuracy and validation of the TCPRLink app has been demonstrated earlier. [17]

128 The illustration of the application in use is presented in **Figure 1**. By clicking the “Press  
129 to start TCPR Link” button, the application activates the speaker, establishes a  
130 telephone connection with the dispatcher, activates the TCPRLink app which captures  
131 and analyzes the CPR movement via the front facing camera of the smartphone in real  
132 time, and simultaneously sends the location and real-time compression data to a web  
133 server which is available for the dispatcher (web server:  
134 <http://tcpmlink.azurewebsites.net/?%20country=china>).

135 At the bystander interface, a speedometer displayed on the smartphone screen next to a  
136 preview frame allows the bystander to keep track of the CC rate, which is obtained by  
137 analyzing body movement. Thus, the individual receives real-time objective feedback  
138 via the speedometer (with the indicator in the green or yellow range of 100–120 and  
139 <100 or >120 compressions/minute, respectively).

140 Similarly, at the dispatcher’s interface, real-time objective feedback is presented during  
141 the emergency call via a sliding window from a website presented on a computer screen  
142 that shows the history and progression of the CC rate. Guided by the indicator on web  
143 server, the dispatcher can further guided the bystander-rendered CC rate through direct  
144 instructions to "push faster", "push slower", or “don’t stop”.

### 145 **Study procedures**

146 The T-CPR performance of all participants were evaluated twice. The first evaluation  
147 (Phase I test) was conducted within one week of WeCanCPR training in a cardiac arrest  
148 T-CPR simulated scenario, and the second occurred 3 months later (Phase II test) and  
149 corresponded to the same setting as the initial test.

150 The simulations were performed in a quiet, isolated, designated room with a manikin  
151 placed on the floor. Individuals were asked to enter the room alone, make an emergency  
152 call to an assigned phone number, and try their best to rescue the manikin in a cardiac



1  
2  
3 153 arrest T-CPR simulated scenario. T-CPR instructions were strictly standardized using  
4  
5 154 the Medical Priority Dispatch System (MPDS version 12.1, Salt Lake City, US) OHCA  
6  
7 155 dispatch protocol.[18] One dispatcher who had 6 years of T-CPR experience from  
8  
9 156 working at the local emergency dispatch center acted as dispatcher in the simulation.

10  
11 157 During T-CPR calls, individuals were asked for their current address, patient's age and  
12  
13 158 gender, patient's consciousness level, and breathing status in accordance with the  
14  
15 159 MPDS protocol. Then, individuals were instructed by the dispatcher to activate the  
16  
17 160 speaker and place their phone on the floor by the manikin. The dispatcher followed a  
18  
19 161 standard procedure to initiate CPR and let the participant perform hands-only CPR for  
20  
21 162 6 minutes. For encouragement, the dispatcher counted the CC rhythm with the  
22  
23 163 participants and said "good job, push harder" every 30 seconds during the simulation.

24  
25 164 For the conventional T-CPR group, the participants received no visual feedback from  
26  
27 165 the smartphone and were guided only by the dispatcher instructions. For the TCPRLink  
28  
29 166 group, individuals were asked to call for help using the TCPRLink app. The  
30  
31 167 participants' behavior and performance during the simulation exercise were recorded  
32  
33 168 by a separate video camera that faced toward the manikin and was located 80 cm above  
34  
35 169 the ground and 1.5 m away for a panoramic shot.

### 36 170 **Outcome measures**

37  
38 171 The primary outcomes measured were the CC rate and the proportion of the adequate  
39  
40 172 CC meeting the guideline-recommended rate (100–120 min<sup>-1</sup>) [19, 20] during 6 minutes  
41  
42 173 of hands-only CPR. The secondary outcomes were CC depth, the proportion of CC with  
43  
44 174 the adequate CC depth (5–6 cm), the proportion of CC with complete recoil (complete  
45  
46 175 release recoil of the chest between compressions), and the absolute hands-off time (the  
47  
48 176 sum of all periods during which there was no hand compression of the chest) during the  
49  
50 177 6 minutes of hands-only CC. The abovementioned parameters of CCs effectiveness  
51  
52 178 were monitored using the proprietary software for the ResusciAnne<sup>®</sup> QCPR manikin  
53  
54 179 (Laerdal Medical, Norway).

55  
56 180 The video recording of the simulation scenario was used to evaluate individual  
57  
58 181 participant behaviors, including the communication with the dispatcher (counting the  
59  
60 182 CC rhythms with the dispatcher) and time to first CC (time interval from call connection  
183 to first CC). We documented the age, sex, education level, self-reported body weight,

184 and height of all participants.

### 185 **Sample size estimation**

186 The sample size calculation was followed to sequentially recruit 68 participants (34 in  
187 the TCPRLink group with 12, 11, and 11 participants in the 18–24, 25–54, and 55–65  
188 years age range, respectively, and 34 in the T-CPR group with 11, 12, and 11  
189 participants in the 18–24, 25–54, and 55–65 years age range, respectively) in the Phase  
190 I test. A change in the proportion of adequate CC by >5% was considered to be a  
191 relevant difference. With a statistical power of 90% and two-sided alpha level of 0.05,  
192 the minimum numbers of participants required in the TCPRLink/T-CPR group among  
193 the different age groups were 20 (18–24 years), 26 (25–54 years), and 18 (55–65 years),  
194 respectively. Considering the possibility of 20% loss to follow-up and the participants’  
195 availability, we recruited 54, 75, and 57 participants in the age ranges of 18–24, 25–54,  
196 and 55–65 years, respectively.

### 197 **Statistical analysis**

198 Data are presented as frequencies with percentages for categorical variables and mean  
199  $\pm$  standard deviation or median (interquartile range, IQR; M [P<sub>25</sub>-P<sub>75</sub>]) for continuous  
200 variables. Normal distribution was confirmed using the Kolmogorov–Smirnov test.  
201 Intergroup differences in the outcomes for the categorical variables were assessed using  
202 the chi-square or Fisher’s exact test. Independent Student *t*-tests were conducted to  
203 explore the effect of the intervention for continuous variables with normal distribution,  
204 and Mann–Whitney *U*-test was used for variables with nonparametric distribution  
205 between the control and intervention arm. All analyses were conducted using SPSS  
206 22.0. All *P*-values were 2-sided, and *P* < 0.05 was considered to be statistically  
207 significant.

## 208 **RESULTS**

209 A total of 186 participants (94 in T-CPR with TCPRLink group and 92 in conventional  
210 T-CPR group) were included in this study. The demographic characteristics are shown  
211 in **Table 1**. Age, gender, education level, and body mass index (BMI) did not differ  
212 between the groups. Eight participants in each study arm were lost to follow-up after  
213 the initial test (**Figure 2**).

214 During the 6 minutes of hands-only CPR, individuals in the TCPRLink group  
215 performed CC with a higher rate, both initially [median 111 (IQR 109–113) vs. 108  
216 (103–112) min<sup>-1</sup>, *P*=0.002] and at the 3-month re-test [111 (109–113) vs. 108 (105–112)  
217 min<sup>-1</sup>, *P*<0.001], compared to the conventional T-CPR group, respectively (**Table 2**  
218 **and Figure 3**). In the TCPRLink group where the CC rate speedometer was displayed,  
219 individuals were less likely to count out the CC rhythms with the dispatcher (21.3% vs.  
220 41.3%, *P*=0.003 and 7% vs. 22.6%, *P*=0.004, respectively) (**Table 2 and Figure 4**).  
221 Hands-off times, CC full-release ratio, and time to first CC did not statistically differ  
222 between the study groups either initially or at 3 months follow-up.

223 The depth of CCs in the TCPRLink group was significantly deeper in the age group of  
224 55–65 years ( $47.1 \pm 9.6$  vs.  $38.5 \pm 8.7$  mm, *P*=0.001) than in the control group in the  
225 Phase I test (**Table 3**). However, the CC depth showed a tendency to be deeper in  
226 TCPRLink group but the difference was not statistically significant in the Phase II test  
227 conducted 3 months later ( $44.7 \pm 10.1$  vs.  $39.3 \pm 10.8$  mm, *P*=0.07; **Table 4**).

## 228 DISCUSSION

229 This study evaluated a novel, digital invention that integrated an audiovisual feedback  
230 smartphone application and a web-based system, thereby combining real-time  
231 dispatcher instructions and real-time feedback to ensure the appropriate quality of CPR.  
232 We compared the quality of T-CPR performed by potential bystander-rescuers in the  
233 age range of 18–65 years in a cardiac arrest simulation scenario with or without the  
234 smartphone application. The results of this study showed that real-time, audiovisual  
235 feedback using a smartphone application and web-based system in combination with  
236 dispatcher instructions augmented the interaction between dispatchers and bystanders  
237 with a resultant positive effect on the quality of bystander-rendered CPR.

238 Dispatchers may coach callers to perform CPR, although they rely on audio  
239 communication alone to understand what is happening. With no other means of  
240 feedback, depending on the dispatcher's instructions may lead to lower quality CC and  
241 more hands-off time.[21] Several experimental manikin studies have demonstrated the  
242 potential benefits and drawbacks of video-assisted communication between rescuers  
243 and dispatchers compared to that of the conventional audio-instructed practice with  
244 regard to the CC rate and hand position.[22–26] In a recent study that compared the

1  
2  
3 245 real-world effects of video- or audio-instructed T-CPR on the resuscitation outcomes,  
4  
5 246 video-instructed T-CPR caused no delay in initiating CC although it was not associated  
6  
7 247 with improvement in the survival rates.[27]

8  
9 248 In dispatch-assisted instructions, the smartphone has secured a role as a promising  
10  
11 249 carrier to improve video resuscitation care with its wide availability and high  
12  
13 250 communication capabilities. Several diversified, advanced smartphone applications  
14  
15 251 have been developed for integration into the links of the chain of survival and have  
16  
17 252 feasibly created a strengthened "Mobile chain of survival" [28] as shown previously.  
18  
19 253 One kind of application guides users in their CPR procedures via text and pictures or  
20  
21 254 provides video examples of CPR with metronomic guidance that a bystander could  
22  
23 255 watch before or during an actual resuscitation.[6, 8] Another application provides  
24  
25 256 measurement of CPR quality and feedback based on motion-sensing which require the  
26  
27 257 user to place the phone on the patient's chest or hold it between the rescuer's hands  
28  
29 258 while performing CPR.[9-12] However, these previous smartphone solutions have  
30  
31 259 neglected the potential to leverage the dispatcher's involvement and, therefore, may be  
32  
33 260 less suitable for real-life emergencies as the phone connection may be accidentally lost  
34  
35 261 when using the phone as a CPR feedback device.

36  
37 262 Given its salient differences with regard to the other smartphone applications, the  
38  
39 263 TCPRLink application could improve the effectiveness of T-CPR, both on the  
40  
41 264 dispatcher instruction and bystander operation aspects. The TCPRLink application  
42  
43 265 utilizes the smartphone front facing camera for continuous quality improvement  
44  
45 266 through real-time feedback for the bystander and the dispatcher. Dispatcher could  
46  
47 267 monitor the hands-off time and encourage the bystander to continue CPR when they  
48  
49 268 experience fatigue. Therefore, this application may be suitable for real-world  
50  
51 269 emergencies when considering the prolonged time to call the dispatch center and start  
52  
53 270 CC, and that phone connection may be accidentally lost when using the phone as a CPR  
54  
55 271 feedback device. [29]

56  
57 272 As the risk of OHCA increases with age, [30, 31] older adults are more likely to be  
58  
59 273 bystanders when their spouse or a family member experiences a cardiac arrest. The  
60  
274 CPR capability of older adults has always been a significant concern. Another study  
275 that evaluated the effectiveness of a smartphone CPR application showed that

1  
2  
3 276 participants aged over 60 years could not sustain long-duration CPR. [9] However, in  
4  
5 277 contrast with the results of that study, our study showed that TCPRLink app used with  
6  
7 278 dispatcher assistance caused extra stimulus among seniors aged 55-65 as indicated by  
8  
9 279 the subgroup analysis, with comparable quality of CPR with that of the younger  
10  
11 280 participants during the 6 minutes of hands-only CPR. Moreover, providing a feasible  
12  
13 281 CPR feedback devices for seniors might be an appropriate approach to increase not only  
14  
15 282 their ability, but also their willingness and confidence to do CPR. [9] When guided by  
16  
17 283 the TCPRLink application, the CC rate and depth of CPR performed by older  
18  
19 284 participants were both better and in adherence to the guidelines when compared with  
20  
21 285 that in the conventional T-CPR group. These data suggest that, with the two-way metric  
22  
23 286 of CPR quality and dispatcher encouragement, older participants performed CPR  
24  
25 287 equally well as did the younger generation.

26  
27 288 Counting aloud is the commonest method by which the dispatcher can ensure an  
28  
29 289 appropriate CC rate in T-CPR. Without feedback from the rescuer, the dispatcher's  
30  
31 290 understanding of the rescuer's situation is poor. [32] Interestingly, we found that visual  
32  
33 291 guidance of the CC rate from the speedometer on the smartphone reduced the need to  
34  
35 292 count the number of CC aloud to maintain an appropriate rate. Thus, rescuers could  
36  
37 293 expend more energy on compression and less on counting. Furthermore, a lesser need  
38  
39 294 for counting in the dispatcher's protocol leaves more time to coach for compression  
40  
41 295 depth and avoiding leaning. Contrary to the common concern that the use of mobile  
42  
43 296 devices or smartphone applications to improve CPR quality might cause a delay in the  
44  
45 297 initiation of CCs, [8, 10] the time to the first CC in the TCPRLink group was not  
46  
47 298 prolonged as compared with that in the conventional T-CPR group in this study.

48  
49 299 Nevertheless, some limitations of this study need to be mentioned. On the one hand,  
50  
51 300 this study was implemented in a simulated environment which may not reflect the real-  
52  
53 301 world scenario. The Hawthorn effect could not be excluded under the simulation  
54  
55 302 scenario, and could result in a motivation bias. Therefore, this study followed a realistic  
56  
57 303 approach to the simulation of bystander CPR in a cardiac arrest scenario. We invited a  
58  
59 304 senior dispatcher who worked in the emergency dispatch center to portray the T-CPR  
60  
305 scenario. On the other hand, a manikin may not represent the diversity of patients'  
306  
307 chests and the changes in chest resistance during extended CPR. Lastly, we recruited  
voluntary participants aged between 18 and 65 years who attended the "WeCan CPR"

1  
2  
3 308 training project. Therefore, the participants of this study might have had a selection bias  
4  
5 309 as they had a positive willingness and knowledge of CPR training. We found that  
6  
7 310 elderly individuals older than 65 years were less likely to participate, considering their  
8  
9 311 physical capacity. The mean age of participants was nearly 40 years, which might not  
10  
11 312 be the representative age for bystanders in real life.

## 12 313 **Conclusions**

14 314 The TCPRLink smartphone application provides real-time feedback to both rescuer and  
15  
16 315 dispatcher to enable more effective CC and lighten the load of counting out the CC with  
17  
18 316 the dispatcher in a simulated T-CPR scenario. Further investigations are required to  
19  
20 317 confirm the effectiveness of this application in the real-life resuscitation scenario.

21  
22 318

24 319 **Acknowledgments:** We would like to acknowledge the participants from Shanghai  
25  
26 320 Jiao Tong University and the Chaoyang community for their time and active  
27  
28 321 involvement in this study.

30 322 **Authors' contributions:** XJ Dong and L Zhang contributed equally to this article. L  
31  
32 323 Zhang conceptualized the study. XJ Dong and L Zhang performed the data collection  
33  
34 324 and analysis. XJ Dong and L Zhang contributed to manuscript writing. L Zhang, H  
35  
36 325 Myklebust, TS Birkenes, and Z-J Zheng provided administrative advice and  
37  
38 326 consultation. H Myklebust, TS Birkenes, and Z-J Zheng critically revised the final  
39  
40 327 version. All authors approved the final version of the manuscript.

42 328 **Competing interests:** All of the authors declare that they have no potential or actual  
43  
44 329 conflicts of interest. H Myklebust and TS Birkenes are employees at Laerdal Medical.  
45  
46 330 The manufacturer (Laerdal Medical, Norway) does not have any conflicts of interest  
47  
48 331 with regard to the trial or in the interpretation of the results.

50 332 **Data availability statement:** Data are available on reasonable request.

52 333 **Research ethics approval:** The study protocol was approved by the Joint Research  
53  
54 334 Ethics Board of the Shanghai Jiao Tong University Schools of Public Health and  
55  
56 335 Nursing (approval ID SJUPN-201714).

1  
2  
3 336 **Funding:** This research was funded by the National Natural Science Foundation of  
4  
5 337 China (Grant No. 81703303); Shanghai Municipal Government Pujiang Research  
6  
7 338 Development Program (Grant No. 17PJC070); HeartRescue Project China Program;  
8  
9 339 and Innovative Research Team of High-level Local Universities in Shanghai.

10  
11 340 **Patient consent for publication:** Not applicable.

12  
13  
14 341 **Provenance and peer review:** Not commissioned; externally peer reviewed.  
15  
16  
17  
18  
19  
20  
21  
22  
23  
24  
25  
26  
27  
28  
29  
30  
31  
32  
33  
34  
35  
36  
37  
38  
39  
40  
41  
42  
43  
44  
45  
46  
47  
48  
49  
50  
51  
52  
53  
54  
55  
56  
57  
58  
59  
60

For peer review only



## 342 REFERENCES

- 343 1. Kern KB, Hilwig RW, Berg RA, et al. Importance of continuous chest compressions during  
344 cardiopulmonary resuscitation: improved outcome during a simulated single lay-rescuer  
345 scenario. *Circulation* 2002;105(5):645-9. doi: 10.1161/hc0502.102963 [published Online  
346 First: 2002/02/06]
- 347 2. Steen S, Liao Q, Pierre L, et al. The critical importance of minimal delay between chest  
348 compressions and subsequent defibrillation: a haemodynamic explanation. *Resuscitation*  
349 2003;58(3):249-58. doi: 10.1016/s0300-9572(03)00265-x [published Online First:  
350 2003/09/13]
- 351 3. Meaney PA, Bobrow BJ, Mancini ME, et al. Cardiopulmonary resuscitation quality:  
352 [corrected] improving cardiac resuscitation outcomes both inside and outside the hospital:  
353 a consensus statement from the American Heart Association. *Circulation* 2013;128(4):417-  
354 35. doi: 10.1161/CIR.0b013e31829d8654 [published Online First: 2013/06/25]
- 355 4. Panchal AR, Berg KM, Cabanas JG, et al. 2019 American Heart Association Focused Update  
356 on Systems of Care: Dispatcher-Assisted Cardiopulmonary Resuscitation and Cardiac  
357 Arrest Centers: An Update to the American Heart Association Guidelines for  
358 Cardiopulmonary Resuscitation and Emergency Cardiovascular Care. *Circulation*  
359 2019;140(24):e895-e903. doi: 10.1161/cir.0000000000000733 [published Online First:  
360 2019/11/15]
- 361 5. Perkins GD, Handley AJ, Koster RW, et al. European Resuscitation Council Guidelines for  
362 Resuscitation 2015: Section 2. Adult basic life support and automated external defibrillation.  
363 *Resuscitation* 2015;95:81-99. doi: <https://doi.org/10.1016/j.resuscitation.2015.07.015>  
364 [published Online First: 2015/10/15]
- 365 6. Semeraro F, Taggi F, Tammaro G, et al. iCPR: a new application of high-quality  
366 cardiopulmonary resuscitation training. *Resuscitation* 2011;82(4):436-41. doi:  
367 10.1016/j.resuscitation.2010.11.023 [published Online First: 2011/01/14]
- 368 7. Zapletal B, Greif R, Stumpf D, et al. Comparing three CPR feedback devices and standard  
369 BLS in a single rescuer scenario: a randomised simulation study. *Resuscitation*  
370 2014;85(4):560-6. doi: 10.1016/j.resuscitation.2013.10.028 [published Online First:  
371 2013/11/13]
- 372 8. Sakai T, Kitamura T, Nishiyama C, et al. Cardiopulmonary resuscitation support application  
373 on a smartphone - randomized controlled trial. *Circ J* 2015;79(5):1052-7. doi:  
374 10.1253/circj.CJ-14-1258 [published Online First: 2015/03/06]
- 375 9. Plata C, Stolz M, Warnecke T, et al. Using a smartphone application (PocketCPR) to  
376 determine CPR quality in a bystander CPR scenario - A manikin trial. *Resuscitation*  
377 2019;137:87-93. doi: 10.1016/j.resuscitation.2019.01.039 [published Online First:  
378 2019/02/19]
- 379 10. Paal P, Pircher I, Baur T, et al. Mobile phone-assisted basic life support augmented with a  
380 metronome. *The Journal of emergency medicine* 2012;43(3):472-7. doi:  
381 10.1016/j.jemermed.2011.09.011 [published Online First: 2012/01/20]
- 382 11. Eaton G, Renshaw J, Gregory P, et al. Can the British Heart Foundation PocketCPR  
383 application improve the performance of chest compressions during bystander resuscitation:  
384 A randomised crossover manikin study. *Health Informatics J* 2018;24(1):14-23. doi:  
385 10.1177/1460458216652645 [published Online First: 2016/07/13]
- 386 12. Kovic I, Lulic I, Lulic D. A new method of investigating the ergonomics of visual  
387 cardiopulmonary resuscitation (CPR) feedback delivery. *Resuscitation* 2012;83(9):e191-2.  
388 doi: 10.1016/j.resuscitation.2012.05.023 [published Online First: 2012/06/12]
- 389 13. Perkins GD, Handley AJ, Koster RW, et al. European Resuscitation Council Guidelines for  
390 Resuscitation 2015: Section 2. Adult basic life support and automated external defibrillation.  
391 *Resuscitation* 2015;95:81-99. doi: 10.1016/j.resuscitation.2015.07.015 [published Online  
392 First: 2015/10/20]



- 1  
2  
3 393 14. Kleinman ME, Goldberger ZD, Rea T, et al. 2017 American Heart Association Focused  
4 394 Update on Adult Basic Life Support and Cardiopulmonary Resuscitation Quality: An  
5 395 Update to the American Heart Association Guidelines for Cardiopulmonary Resuscitation  
6 396 and Emergency Cardiovascular Care. *Circulation* 2018;137(1):e7-e13. doi:  
7 397 10.1161/cir.0000000000000539 [published Online First: 2017/11/09]  
8 398 15. Meinich-Bache Ø, Engan K, Birkenes TS, et al. Real-Time Chest Compression Quality  
9 399 Measurements by Smartphone Camera. *J Healthc Eng* 2018;2018:6241856-56. doi:  
10 400 10.1155/2018/6241856  
11 401 16. The WeCan CPR Training Program in China  
12 402 [https://www.globalresuscitationalliance.org/wp-](https://www.globalresuscitationalliance.org/wp-content/uploads/2019/12/China_Community_Training.pdf)  
13 403 [content/uploads/2019/12/China\\_Community\\_Training.pdf](https://www.globalresuscitationalliance.org/wp-content/uploads/2019/12/China_Community_Training.pdf)2019 [accessed 01/05 2020].  
14 404 17. Meinich-Bache O, Engan K, Birkenes TS, et al. Real-Time Chest Compression Quality  
15 405 Measurements by Smartphone Camera. *Journal of healthcare engineering*  
16 406 2018;2018:6241856. doi: 10.1155/2018/6241856 [published Online First: 2018/12/26]  
17 407 18. Medical Priority Dispatch System (version 12.1.3) Salt Lake City, Utah, USA2008  
18 408 19. Monsieurs KG, Nolan JP, Bossaert LL, et al. European Resuscitation Council Guidelines  
19 409 for Resuscitation 2015: Section 1. Executive summary. *Resuscitation* 2015;95:1-80. doi:  
20 410 10.1016/j.resuscitation.2015.07.038 [published Online First: 2015/10/20]  
21 411 20. Neumar RW, Shuster M, Callaway CW, et al. Part 1: Executive Summary: 2015 American  
22 412 Heart Association Guidelines Update for Cardiopulmonary Resuscitation and Emergency  
23 413 Cardiovascular Care. *Circulation* 2015;132(18 Suppl 2):S315-67. doi:  
24 414 10.1161/cir.0000000000000252 [published Online First: 2015/10/17]  
25 415 21. Birkenes TS, Myklebust H, Neset A, et al. Quality of CPR performed by trained bystanders  
26 416 with optimized pre-arrival instructions. *Resuscitation* 2014;85(1):124-30. doi:  
27 417 10.1016/j.resuscitation.2013.09.015 [published Online First: 2013/10/2]  
28 418 22. Lin Y-Y, Chiang W-C, Hsieh M-J, et al. Quality of audio-assisted versus video-assisted  
29 419 dispatcher-instructed bystander cardiopulmonary resuscitation: A systematic review and  
30 420 meta-analysis. *Resuscitation* 2018;123:77-85. doi: 10.1016/j.resuscitation.2017.12.010  
31 421 [published Online First: 2017/12/12]  
32 422 23. Lee JS, Jeon WC, Ahn JH, et al. The effect of a cellular-phone video demonstration to  
33 423 improve the quality of dispatcher-assisted chest compression-only cardiopulmonary  
34 424 resuscitation as compared with audio coaching. *Resuscitation* 2011;82:64-8. doi:  
35 425 10.1016/j.resuscitation.2010.09.467 [published Online First: 2010/10/30]  
36 426 24. Stipulante S, Delfosse AS, Donneau AF, et al. Inter-active videoconferencing versus audio  
37 427 telephone calls for dispatcher-assisted cardiopulmonary resuscitation using the ALERT  
38 428 algorithm: a randomized trial. *Eur J Emerg Med* 2016;23:418-24. doi:  
39 429 10.1097/MEJ.0000000000000338.  
40 430 25. Bolle SR, Scholl J, Gilbert M. Can video mobile phones improve CPR quality when used  
41 431 for dispatcher assistance during simulated cardiac arrest. *Acta Anaesthesiol Scand*  
42 432 2009;53:116-20. doi: 10.1111/j.1399-6576.2008.01779.x [published Online First:  
43 433 2008/10/22]  
44 434 26. Johnsen E, Bolle SR. To see or not to see—better dispatcher-assisted CPR with video-calls?  
45 435 A qualitative study based on simulated trials. *Resuscitation* 2008;78:320-6. doi:  
46 436 10.1016/j.resuscitation.2008.04.024 [published Online First: 2008/06/25]  
47 437 27. Lee SY, Song KJ, Shin SD, et al. Comparison of the effects of audio-instructed and video-  
48 438 instructed dispatcher-assisted cardiopulmonary resuscitation on resuscitation outcomes after  
49 439 out-of-hospital cardiac arrest. *Resuscitation* 2020;147:12-20. doi:  
50 440 10.1016/j.resuscitation.2019.12.004 [published Online First: 2019/12/13]  
51  
52 441 28. Kovic I, Lulic I. Mobile phone in the chain of survival. *Resuscitation* 2011;82(6):776-9.  
53 442 doi: 10.1016/j.resuscitation.2011.02.014 [published Online First: 2011/04/08]  
54  
55  
56  
57  
58  
59  
60

- 1  
2  
3 443 29. Paal P, Pircher I, Baur T, et al. Mobile phone-assisted basic life support augmented with a  
4 444 metronome. *The Journal of emergency medicine* 2012;43:472-7. doi:  
5 445 10.1016/j.jemermed.2011.09.011 [published Online First: 2012/01/17]  
6  
7 446 30. Sasson C, Rogers MAM, Dahl J, et al. Predictors of Survival From Out-of-Hospital Cardiac  
8 447 Arrest. *Circulation: Cardiovascular Quality and Outcomes* 2010;3(1):63-81. doi:  
9 448 10.1161/circoutcomes.109.889576 [published Online First: 2009/11/10]  
10 449 31. Wissenberg M, Lippert FK, Folke F, et al. Association of National Initiatives to Improve  
11 450 Cardiac Arrest Management With Rates of Bystander Intervention and Patient Survival  
12 451 After Out-of-Hospital Cardiac Arrest. *JAMA* 2013;310(13):1377-84. doi:  
13 452 10.1001/jama.2013.278483  
14 453 32. Johnsen E, Bolle SR. To see or not to see--better dispatcher-assisted CPR with video-calls?  
15 454 A qualitative study based on simulated trials. *Resuscitation* 2008;78(3):320-6. doi:  
16 455 10.1016/j.resuscitation.2008.04.024 [published Online First: 2008/06/25]  
17  
18 456  
19  
20  
21  
22  
23  
24  
25  
26  
27  
28  
29  
30  
31  
32  
33  
34  
35  
36  
37  
38  
39  
40  
41  
42  
43  
44  
45  
46  
47  
48  
49  
50  
51  
52  
53  
54  
55  
56  
57  
58  
59  
60

**Table 1.** Demographic characteristics of the participants

|                                     | <b>Total<br/>(N=186)</b> | <b>TCPRLink group<br/>(n=94)</b> | <b>T-CPR group<br/>(n=92)</b> |
|-------------------------------------|--------------------------|----------------------------------|-------------------------------|
| Male (n, %)                         | 83 (44.6)                | 42 (44.7)                        | 41 (44.6)                     |
| Age, years                          |                          |                                  |                               |
| 18–24                               | 54 (27.0)                | 29 (30.9)                        | 25 (27.2)                     |
| 25–54                               | 75 (37.5)                | 37 (39.4)                        | 38 (41.3)                     |
| 55–65                               | 57 (28.5)                | 28 (29.8)                        | 29 (31.5)                     |
| Education status (n, %)             |                          |                                  |                               |
| ≤High school/junior college         | 68 (36.6)                | 30 (31.9)                        | 38 (41.3)                     |
| College                             | 75 (40.3)                | 44 (46.8)                        | 31 (33.7)                     |
| Masters and PhD                     | 43 (23.1)                | 20 (21.3)                        | 23 (25.0)                     |
| Height, m, means ± SD               | 1.68 ± 0.1               | 1.67 ± 0.1                       | 1.68 ± 0.1                    |
| Weight, kg, means ± SD              | 64.5 ± 11.4              | 63.3 ± 10.3                      | 65.6 ± 12.4                   |
| BMI, kg/m <sup>2</sup> , means ± SD | 22.9 ± 3.1               | 22.7 ± 2.8                       | 23.0 ± 3.4                    |

**Table 2.** Participants' CPR performance assessment in the T-CPR simulation scenario

| T-CPR performance                                                      | Phase I (N=186)       |                    |         | Phase II (N=170)      |                    |         |
|------------------------------------------------------------------------|-----------------------|--------------------|---------|-----------------------|--------------------|---------|
|                                                                        | TCPRLink group (n=94) | T-CPR group (n=92) | P-value | TCPRLink group (n=86) | T-CPR group (n=84) | P-value |
| <b>Counting with the dispatcher (n, %)</b>                             | 20 (21.3)             | 38 (41.3)          | 0.003   | 6 (7.0)               | 19 (22.6)          | 0.004   |
| <b>Time from call connected to: (seconds, mean ± SD)</b>               |                       |                    |         |                       |                    |         |
| Cardiac arrest identification                                          | 98.2 ± 12.8           | 99.1 ± 16.9        | 0.68    | 101.7 ± 13.0          | 104.2 ± 15.0       | 0.25    |
| First chest compression                                                | 143.6 ± 17.8          | 140.0 ± 25.8       | 0.27    | 149.7 ± 16.6          | 146.0 ± 20.2       | 0.19    |
| <b>CPR parameters [M (P<sub>25</sub>-P<sub>75</sub>) or mean ± SD]</b> |                       |                    |         |                       |                    |         |
| Total number of compressions                                           | 661 (643–674)         | 648 (615–674)      | 0.035   | 661 (644–675)         | 646 (630–667)      | 0.002   |
| Average compression rate (min <sup>-1</sup> )                          | 111 (109–113)         | 108 (103–112)      | 0.002   | 111 (109–113)         | 108 (105–112)      | <0.001  |
| Percentage of adequate rate (100–120 min <sup>-1</sup> , %)            | 96 (89–98)            | 82 (50–97)         | <0.001  | 95 (78–98)            | 93 (67–97)         | 0.11    |
| Average compression depth (mm)                                         | 45.4 ± 8.8            | 43.6 ± 8.8         | 0.17    | 43.9 ± 9.1            | 42.9 ± 11.5        | 0.59    |
| Percentage of adequate depth (50–60 mm, %)                             | 20 (3–74)             | 12 (0–51)          | 0.14    | 17 (4–54)             | 13 (0–57)          | 0.26    |
| Percentage of fully released (%)                                       | 97 (72–100)           | 97 (69–100)        | 0.79    | 95 (54–100)           | 96 (51–100)        | 0.40    |
| Average hands-off time (s)                                             | 0 (0–1)               | 0 (0–1)            | 0.24    | 0 (0–1)               | 0 (0–1)            | 0.72    |

Phase I tests were cardiopulmonary resuscitation (CPR) performance and capabilities assessment using the telephone-assisted CPR (T-CPR) simulation scenario among individuals who have undergone CPR training with/without the TCPRLink application.

Phase II tests were CPR skill retention assessments among individuals with/without TCPRLink application after 3 months.

**Table 3** Age-stratified comparison of the participants' CPR performance in the TCPRLink and T-CPR groups (Phase I)

| TCPR performance                                                       | Age 18–24 years       |                    |         | Age 25–54 years       |                    |         | Age 55–65 years       |                    |         |
|------------------------------------------------------------------------|-----------------------|--------------------|---------|-----------------------|--------------------|---------|-----------------------|--------------------|---------|
|                                                                        | TCPRLink group (n=29) | T-CPR group (n=25) | P-value | TCPRLink group (n=37) | T-CPR group (n=38) | P-value | TCPRLink group (n=28) | T-CPR group (n=29) | P-value |
| <b>Counting with the dispatcher (n, %)</b>                             | 9 (31.0)              | 12 (48.0)          | 0.20    | 7 (18.9)              | 19 (50.0)          | 0.005   | 4 (14.3)              | 7 (4.1)            | 0.35    |
| <b>Time from call connection to: (seconds, mean ± SD)</b>              |                       |                    |         |                       |                    |         |                       |                    |         |
| Cardiac arrest identification                                          | 98.9 ± 13.5           | 96.4 ± 19.5        | 0.58    | 97.0 ± 13.2           | 98.2 ± 14.0        | 0.72    | 98.9 ± 12.0           | 102.7 ± 17.8       | 0.36    |
| First chest compression                                                | 141.4 ± 20.2          | 137.8 ± 26.8       | 0.57    | 143.6 ± 17.7          | 135.9 ± 26.9       | 0.14    | 145.8 ± 15.4          | 147.1 ± 22.5       | 0.79    |
| <b>CPR parameters [M (P<sub>25</sub>-P<sub>75</sub>) or mean ± SD]</b> |                       |                    |         |                       |                    |         |                       |                    |         |
| Total number of compression                                            | 663 (640–671)         | 650 (608–666)      | 0.21    | 659 (653–677)         | 652 (632–674)      | 0.29    | 659 (640–676)         | 640 (612–672)      | 0.14    |
| Average compression rate, (min <sup>-1</sup> )                         | 111 (108–113)         | 108 (101–112)      | 0.03    | 111 (109–114)         | 109 (106–113)      | 0.12    | 110 (107–113)         | 107 (103–113)      | 0.06    |
| Percentage of adequate rate, (100–120 min <sup>-1</sup> , %)           | 95 (88–99)            | 82 (50–96)         | 0.01    | 97 (90–98)            | 89 (51–97)         | 0.006   | 95 (88–97)            | 71 (48–95)         | 0.003   |
| Average compression depth (mm)                                         | 41.8 ± 7.8            | 43.1 ± 6.6         | 0.49    | 46.9 ± 8.2            | 47.8 ± 8.1         | 0.67    | 47.1 ± 9.6            | 38.5 ± 8.7         | 0.001   |
| Percentage of adequate depth (50–60 mm, %)                             | 8 (0–28)              | 12 (4–33)          | 0.37    | 25 (9–84)             | 37 (7–86)          | 0.92    | 45 (1–99)             | 1 (0–14)           | 0.002   |
| Percentage of fully released (%)                                       | 100 (95–100)          | 100 (96–100)       | 0.66    | 98 (79–100)           | 95 (57–99)         | 0.24    | 71 (5–100)            | 96 (37–100)        | 0.13    |
| Average hands-off time (s)                                             | 0 (0–2)               | 0 (0–1)            | 0.24    | 0 (0–1)               | 0 (0–0)            | 0.45    | 0 (0–1)               | 0 (0–1)            | 0.92    |

Phase I tests were conducted for the evaluation of CPR performance and capabilities assessment using a telephone-assisted CPR (T-CPR) simulation scenario among individuals who have undergone CPR training with/without the TCPRLink application.

**Table 4** Age-stratified comparison of the participants' CPR performance between the TCPRLink and T-CPR groups (Phase II)

| TCPR performance                                                      | Age 18–24 years       |                    |                 | Age 25–54 years       |                    |                 | Age 55–65 years       |                    |                 |
|-----------------------------------------------------------------------|-----------------------|--------------------|-----------------|-----------------------|--------------------|-----------------|-----------------------|--------------------|-----------------|
|                                                                       | TCPRLink group (n=29) | T-CPR group (n=23) | <i>P</i> -value | TCPRLink group (n=31) | T-CPR group (n=34) | <i>P</i> -value | TCPRLink group (n=26) | T-CPR group (n=27) | <i>P</i> -value |
| <b>Counting with the dispatcher (n, %)</b>                            | 2 (6.9)               | 4 (17.4)           | 0.40            | 4 (12.9)              | 12 (35.3)          | 0.036           | 0 (0)                 | 3 (11.1)           | 0.24            |
| <b>Time from call connected to: (seconds, mean ± SD)</b>              |                       |                    |                 |                       |                    |                 |                       |                    |                 |
| Cardiac arrest identification                                         | 99.8 ± 16.0           | 100.4 ± 16.3       | 0.89            | 103.8 ± 13.6          | 103.0 ± 11.9       | 0.82            | 101.4 ± 7.3           | 108.9 ± 16.7       | 0.04            |
| First chest compression                                               | 148.4 ± 20.1          | 144.2 ± 25.5       | 0.52            | 153.2 ± 17.3          | 143.6 ± 13.9       | 0.018           | 146.8 ± 9.8           | 150.4 ± 21.9       | 0.45            |
| <b>CPR parameters [M(P<sub>25</sub>-P<sub>75</sub>) or mean ± SD]</b> |                       |                    |                 |                       |                    |                 |                       |                    |                 |
| Total number of compressions                                          | 658 (643–678)         | 639 (605–653)      | 0.004           | 665 (653–675)         | 648 (640–668)      | 0.09            | 663 (644–676)         | 643 (627–680)      | 0.32            |
| Average compression rate (min <sup>-1</sup> )                         | 111 (109–113)         | 107 (101–110)      | <0.001          | 112 (109–113)         | 109 (107–112)      | 0.06            | 111 (107–114)         | 109 (105–114)      | 0.28            |
| Percentage of adequate rate (100-120 min <sup>-1</sup> , %)           | 96 (82–99)            | 82 (60–98)         | 0.08            | 95 (78–98)            | 95 (84–97)         | 0.64            | 92 (77–98)            | 90 (70–97)         | 0.61            |
| Average compression depth (mm)                                        | 41.7 ± 8.2            | 43.7 ± 14.1        | 0.55            | 45.2 ± 9.0            | 45.4 ± 9.6         | 0.92            | 44.7 ± 10.1           | 39.3 ± 10.8        | 0.07            |
| Percentage of adequate depth (50–60 mm, %)                            | 10 (2–32)             | 10 (0–54)          | 0.92            | 19 (7–55)             | 22 (2–81)          | 0.97            | 19 (3–68)             | 2 (0–24)           | 0.04            |
| Percentage of fully released compressions (%)                         | 100 (92–100)          | 99 (91–100)        | 0.52            | 93 (15–100)           | 90 (44–99)         | 0.65            | 68 (33–100)           | 89 (24–99)         | 0.84            |
| Average hands-off time (s)                                            | 0 (0–2)               | 0 (0–1)            | 0.16            | 0 (0–1)               | 0 (0–1)            | 0.48            | 0 (0–0)               | 0 (0–0)            | 0.89            |

Phase II tests were conducted for the evaluation of CPR performance and capabilities assessment using telephone-assisted CPR (T-CPR) simulation scenario among individuals who have received CPR training with/without a TCPRLink application at 3 months after the training.

## Figure Legends

**Figure 1** The illustration of TCPRLink application in use.

(a) Illustration photo of TCPRLink in use in a simulated T-CPR situation. (b) Screenshots of TCPRLink. Front page to the left and bystander feedback example to the right. (c) Screenshot of the web server available for the dispatcher.

**Figure 2** Flow diagram of the participants.

**Figure 3** Distribution of the chest compression rate and the proportion of the adequate chest compression rate (100-120 min<sup>-1</sup>) in TCPRLink group and T-CPR group.

Phase I test was conducted in T-CPR trained individuals with/without TCPRLink App after inclusion.

Phase II test was conducted in the same individuals with/without TCPRLink App after three months.

**Figure 4** Counting with dispatcher in TCPRLink group and T-CPR group.

Phase I test was conducted in T-CPR trained individuals with/without TCPRLink App after inclusion.

Phase II test was conducted in the same individuals with/without TCPRLink App after three months.

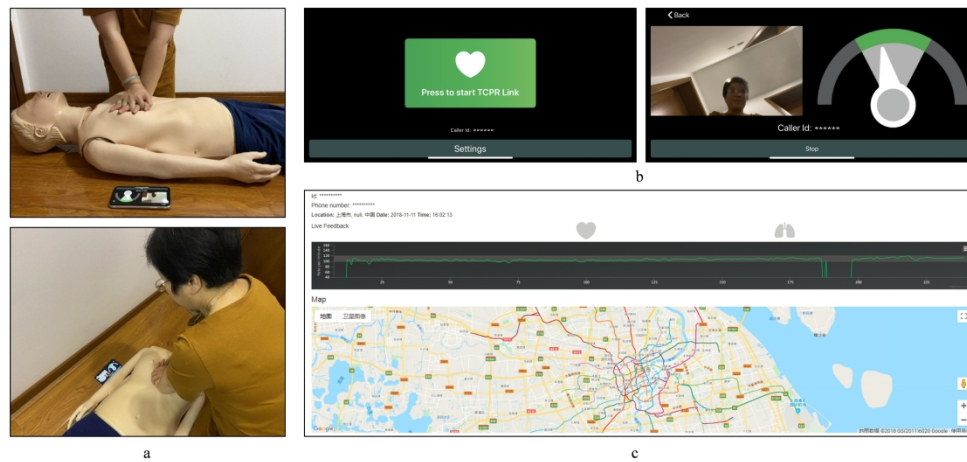

23 Figure 1 The illustration of TCPRLink application in use.  
24 (a) Illustration photo of TCPRLink in use in a simulated T-CPR situation. (b) Screenshots of TCPRLink. Front  
25 page to the left and bystander feedback example to the right. (c) Screenshot of the web server available for  
26 the dispatcher.

27 225x111mm (600 x 600 DPI)



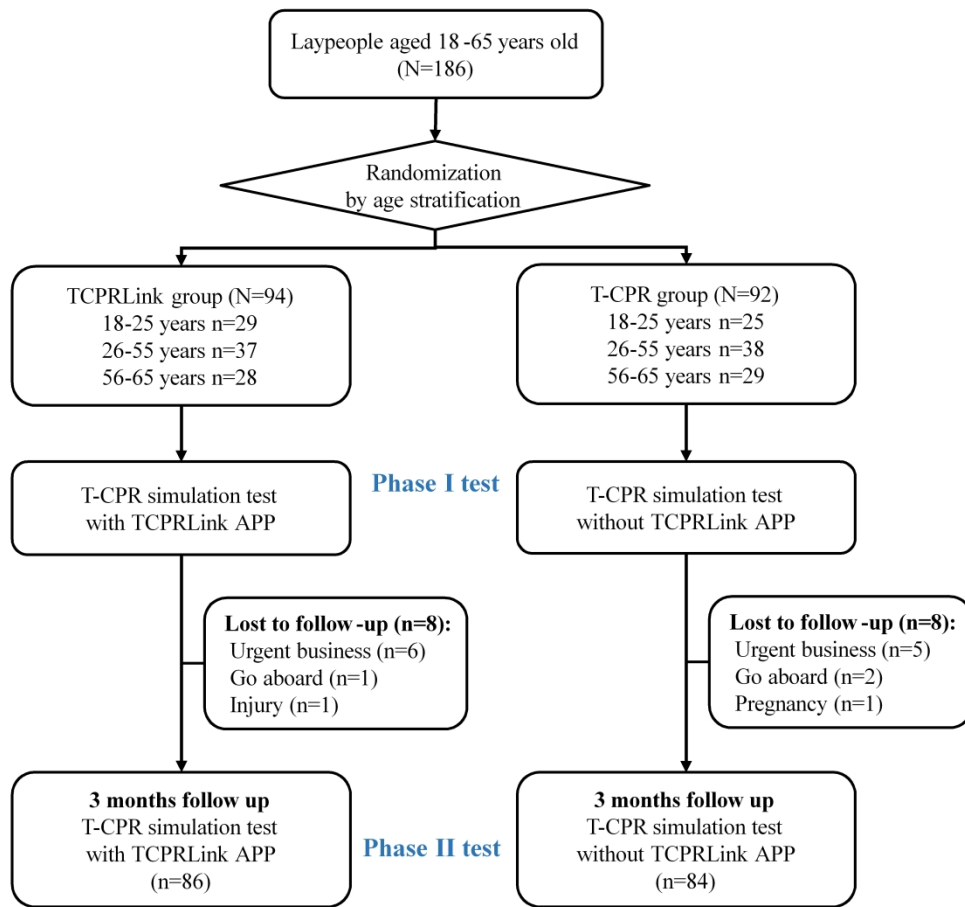

Figure 2 Flow diagram of the participants.

187x175mm (600 x 600 DPI)

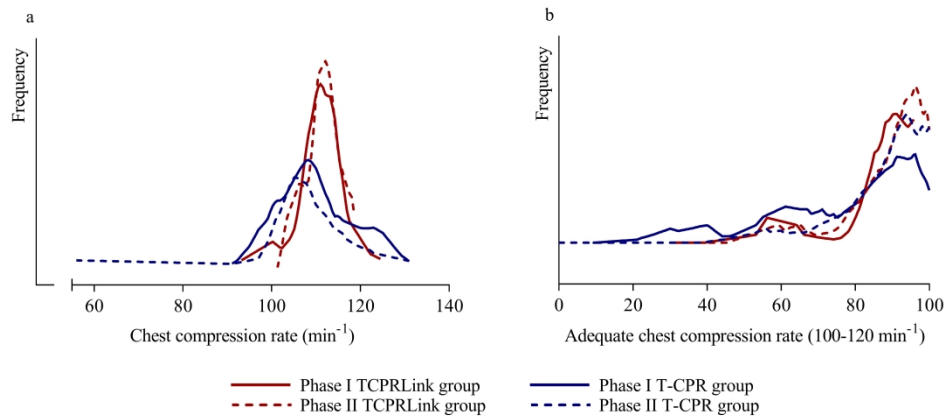

Figure 3 Distribution of the chest compression rate and the proportion of the adequate chest compression rate (100-120 min<sup>-1</sup>) in TCPRLink group and T-CPR group.

Phase I test was conducted in T-CPR trained individuals with/without TCPRLink App after inclusion. Phase II test was conducted in the same individuals with/without TCPRLink App after three months.

269x117mm (600 x 600 DPI)

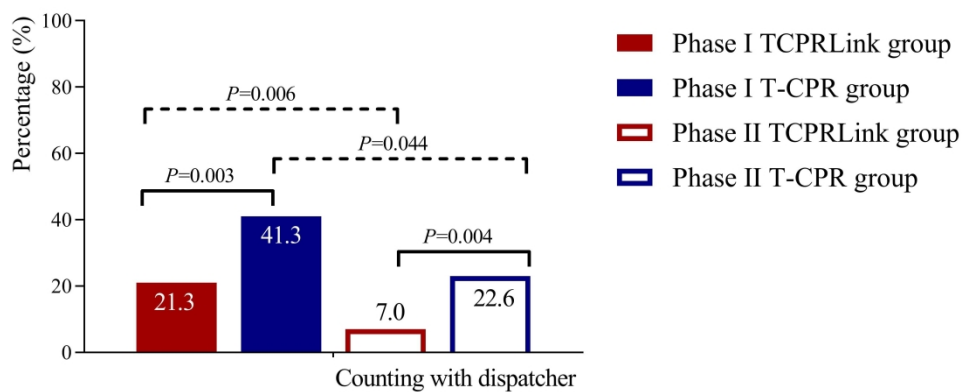

Figure 4 Counting with dispatcher in TCPRLink group and T-CPR group. Phase I test was conducted in T-CPR trained individuals with/without TCPRLink App after inclusion. Phase II test was conducted in the same individuals with/without TCPRLink App after three months.

152x66mm (600 x 600 DPI)



## CONSORT 2010 checklist of information to include when reporting a randomised trial\*

| Section/Topic                    | Item No | Checklist item                                                                                                                                                                              | Reported on page No |
|----------------------------------|---------|---------------------------------------------------------------------------------------------------------------------------------------------------------------------------------------------|---------------------|
| <b>Title and abstract</b>        |         |                                                                                                                                                                                             |                     |
|                                  | 1a      | Identification as a randomised trial in the title                                                                                                                                           | 1                   |
|                                  | 1b      | Structured summary of trial design, methods, results, and conclusions (for specific guidance see CONSORT for abstracts)                                                                     | 2                   |
| <b>Introduction</b>              |         |                                                                                                                                                                                             |                     |
| Background and objectives        | 2a      | Scientific background and explanation of rationale                                                                                                                                          | 4                   |
|                                  | 2b      | Specific objectives or hypotheses                                                                                                                                                           | 4                   |
| <b>Methods</b>                   |         |                                                                                                                                                                                             |                     |
| Trial design                     | 3a      | Description of trial design (such as parallel, factorial) including allocation ratio                                                                                                        | 5                   |
|                                  | 3b      | Important changes to methods after trial commencement (such as eligibility criteria), with reasons                                                                                          | \                   |
| Participants                     | 4a      | Eligibility criteria for participants                                                                                                                                                       | 5                   |
|                                  | 4b      | Settings and locations where the data were collected                                                                                                                                        | 5                   |
| Interventions                    | 5       | The interventions for each group with sufficient details to allow replication, including how and when they were actually administered                                                       | 5, 6                |
| Outcomes                         | 6a      | Completely defined pre-specified primary and secondary outcome measures, including how and when they were assessed                                                                          | 7                   |
|                                  | 6b      | Any changes to trial outcomes after the trial commenced, with reasons                                                                                                                       | \                   |
| Sample size                      | 7a      | How sample size was determined                                                                                                                                                              | 7, 8                |
|                                  | 7b      | When applicable, explanation of any interim analyses and stopping guidelines                                                                                                                | \                   |
| <b>Randomisation:</b>            |         |                                                                                                                                                                                             |                     |
| Sequence generation              | 8a      | Method used to generate the random allocation sequence                                                                                                                                      | 5                   |
|                                  | 8b      | Type of randomisation; details of any restriction (such as blocking and block size)                                                                                                         | 5                   |
| Allocation concealment mechanism | 9       | Mechanism used to implement the random allocation sequence (such as sequentially numbered containers), describing any steps taken to conceal the sequence until interventions were assigned | \                   |
| Implementation                   | 10      | Who generated the random allocation sequence, who enrolled participants, and who assigned participants to interventions                                                                     | 5                   |
| Blinding                         | 11a     | If done, who was blinded after assignment to interventions (for example, participants, care providers, those                                                                                | \                   |

|                                                      |     |                                                                                                                                                   |             |
|------------------------------------------------------|-----|---------------------------------------------------------------------------------------------------------------------------------------------------|-------------|
|                                                      |     | assessing outcomes) and how                                                                                                                       |             |
|                                                      | 11b | If relevant, description of the similarity of interventions                                                                                       | \           |
| Statistical methods                                  | 12a | Statistical methods used to compare groups for primary and secondary outcomes                                                                     | 8           |
|                                                      | 12b | Methods for additional analyses, such as subgroup analyses and adjusted analyses                                                                  | 8           |
| <b>Results</b>                                       |     |                                                                                                                                                   |             |
| Participant flow (a diagram is strongly recommended) | 13a | For each group, the numbers of participants who were randomly assigned, received intended treatment, and were analysed for the primary outcome    | 8, Figure 2 |
|                                                      | 13b | For each group, losses and exclusions after randomisation, together with reasons                                                                  | Figure 2    |
| Recruitment                                          | 14a | Dates defining the periods of recruitment and follow-up                                                                                           | 5           |
|                                                      | 14b | Why the trial ended or was stopped                                                                                                                | \           |
| Baseline data                                        | 15  | A table showing baseline demographic and clinical characteristics for each group                                                                  | Table 1     |
| Numbers analysed                                     | 16  | For each group, number of participants (denominator) included in each analysis and whether the analysis was by original assigned groups           | Figure 2    |
| Outcomes and estimation                              | 17a | For each primary and secondary outcome, results for each group, and the estimated effect size and its precision (such as 95% confidence interval) | Table 2     |
|                                                      | 17b | For binary outcomes, presentation of both absolute and relative effect sizes is recommended                                                       | \           |
| Ancillary analyses                                   | 18  | Results of any other analyses performed, including subgroup analyses and adjusted analyses, distinguishing pre-specified from exploratory         | Table 3-4   |
| Harms                                                | 19  | All important harms or unintended effects in each group (for specific guidance see CONSORT for harms)                                             | \           |
| <b>Discussion</b>                                    |     |                                                                                                                                                   |             |
| Limitations                                          | 20  | Trial limitations, addressing sources of potential bias, imprecision, and, if relevant, multiplicity of analyses                                  | 11          |
| Generalisability                                     | 21  | Generalisability (external validity, applicability) of the trial findings                                                                         | 9-11        |
| Interpretation                                       | 22  | Interpretation consistent with results, balancing benefits and harms, and considering other relevant evidence                                     | 9-11        |
| <b>Other information</b>                             |     |                                                                                                                                                   |             |
| Registration                                         | 23  | Registration number and name of trial registry                                                                                                    | \           |
| Protocol                                             | 24  | Where the full trial protocol can be accessed, if available                                                                                       | \           |
| Funding                                              | 25  | Sources of funding and other support (such as supply of drugs), role of funders                                                                   | 1, 12       |

\*We strongly recommend reading this statement in conjunction with the CONSORT 2010 Explanation and Elaboration for important clarifications on all the items. If relevant, we also recommend reading CONSORT extensions for cluster randomised trials, non-inferiority and equivalence trials, non-pharmacological treatments, herbal interventions, and pragmatic trials. Additional extensions are forthcoming: for those and for up to date references relevant to this checklist, see [www.consort-statement.org](http://www.consort-statement.org).
